1

2

EFF-1 promotes muscle fusion, paralysis and retargets

3

infection by AFF-1-coated viruses in *C. elegans*

4

5

6 Anna Meledin<sup>1</sup>, Xiaohui Li<sup>1</sup>, Elena Matveev<sup>1</sup>, Boaz Gildor<sup>1</sup>, Ofer Katzir<sup>1</sup> and Benjamin

7 Podbilewicz<sup>1\*</sup>

8

<sup>1</sup>Department of Biology, Technion- Israel Institute of Technology, Haifa, 32000, Israel

9

10

11 \*Correspondence to: [podbilew@technion.ac.il](mailto:podbilew@technion.ac.il)

12

13

14 Running title: Abnormally fused muscles infected by fusexin-coated virus

15

16 **Graphical abstract:**

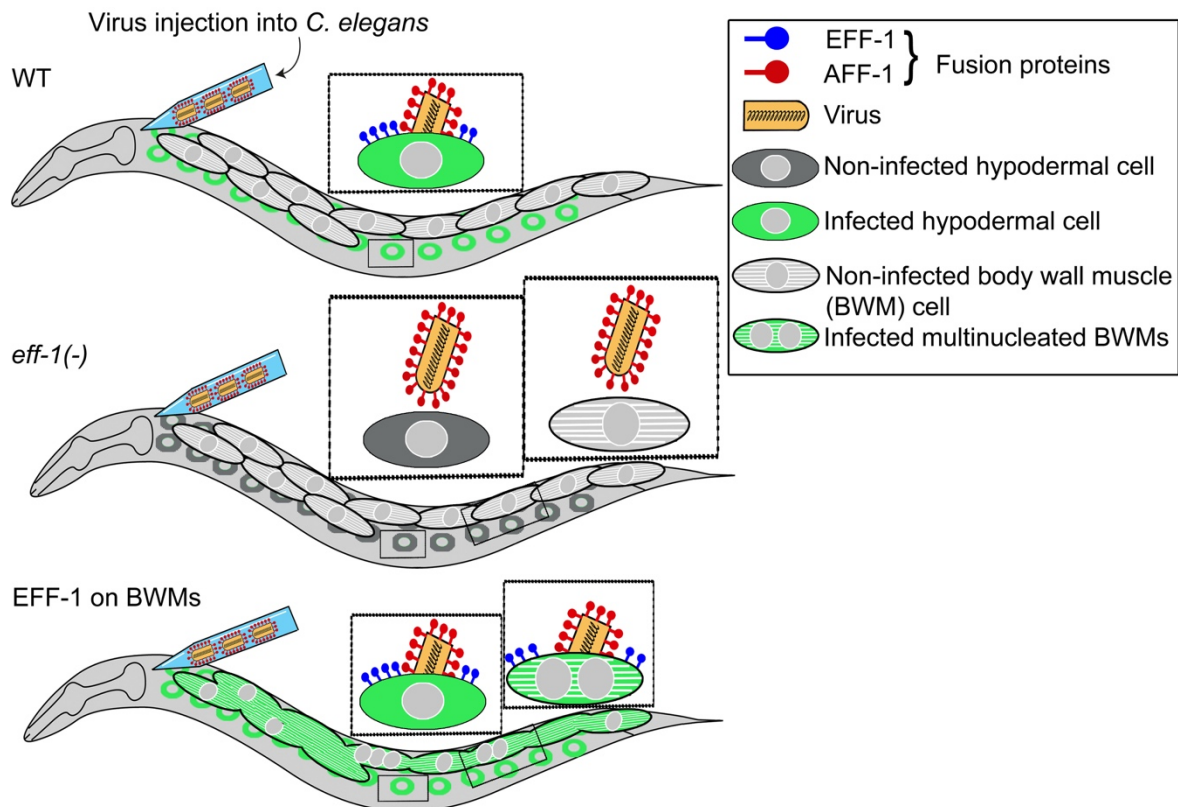

17

18

19 **A hallmark of muscle development is that myoblasts fuse to form myofibers. However,**  
20 **smooth muscles and cardiomyocytes do not generally fuse. In *C. elegans*, the body wall**  
21 **muscles (BWMs), the physiological equivalents of skeletal muscles, are mononuclear.**  
22 **Here, to determine what would be the consequences of fusing BWMs, we express the**  
23 **cell-cell fusogen EFF-1 in these cells. We find that EFF-1 induces paralysis and dumpy**  
24 **phenotypes. To determine whether EFF-1-induced muscle fusion results in these**  
25 **pathologies we injected viruses pseudotyped with AFF-1, a paralog of EFF-1, into the**  
26 **pseudocoelom of *C. elegans*. When these engineered viruses encounter cells**  
27 **expressing EFF-1 or AFF-1 they are able to infect them as revealed by GFP expression**  
28 **from the viral genome. We find that AFF-1 viruses can fuse to EFF-1-expressing**  
29 **muscles revealing multinucleated fibers that cause paralysis and abnormal muscle**  
30 **morphogenesis. Thus, aberrant fusion of otherwise non-syncytial muscle cells may**  
31 **lead to pathological conditions.**

32

### 33 **Significance statement**

34 Most cells are individual units that do not mix their cytoplasm. However, some cells fuse to  
35 become multinucleated in placenta, bones and muscles. In most animals, muscles are formed  
36 by myofibers that originate by cell-cell fusion. In contrast, in *C. elegans* the body wall muscles  
37 are mononucleated cells that mediate worm-like movement. EFF-1 and AFF-1 fusogens  
38 mediate physiological cell fusion in *C. elegans*. By ectopically expressing EFF-1 in body wall  
39 muscles we induce their fusion resulting in behavioral and morphological deleterious effects,  
40 revealing possible causes of congenital myopathies in humans. Using AFF-1-coated  
41 pseudoviruses we infect EFF-1-expressing muscle cells retargeting viral infection into these  
42 cells. We suggest that virus retargeting can be utilized to study myogenesis, neuronal  
43 regeneration, gamete fusion and screens for new fusogens in different organisms. In addition,  
44 our virus retargeting system can be used in gene-therapy, viral-based oncolysis and to study  
45 viral-host interactions.

46  
47

### 48 **Introduction**

49 Vesicular Stomatitis Virus (VSV) is an enveloped negative strand RNA rhabdovirus. VSV  
50 utilizes its surface glycoprotein G (VSV-G) to infect vertebrates and invertebrates and lyses  
51 many cell lines tested to date [1–3]. VSV is widely used for pseudotyping other viruses and  
52 has a high transduction efficiency [1–4]. These properties turned VSVΔG into a promising  
53 vector for gene therapy, tissue regeneration, viral-based oncolysis, and VSV-based vaccines,  
54 some of which successfully completed phase III clinical trials [1,5]. Moreover, VSV-based  
55 vectors are useful for studying mechanisms of transcription and replication of RNA viruses,  
56 cellular trafficking, antiviral responses and fusion proteins (fusogens) [6–9]. However, the  
57 major bottleneck for both applied and fundamental research purposes is achieving an efficient  
58 and specific targeting of VSV-based vectors into desired cells/tissues of a live, multicellular  
59 organism [3]. Like other viruses, VSV lacks specificity for desired target cells as it suggestively  
60 enters cells through highly ubiquitous receptors such as the LDL receptor [10]. Retargeting  
61 VSV into particular tissues of interest therefore requires blocking the virus' natural interactions  
62 providing new, cell-specific interactions. Indeed, mutation or substitution of VSV-G with  
63 glycoproteins from other viruses or chimeric glycoproteins coupled with antibodies can  
64 retarget VSV to specific cells [3,4,11–13].

65 VSV-G is a class III viral fusogen whereas the *Caenorhabditis elegans* EFF-1 and AFF-  
66 1, which fuse somatic cells during development, are structural homologs of class II viral

67 proteins and gamete HAP2(GCS1) fusogens from the fusexin family [14–22]. EFF-1 and AFF-  
68 1 also participate in maintaining neuronal architecture and neuronal reconnection following  
69 injury [23–27]. Studied viral glycoproteins, including VSV-G, use a unilateral fusion  
70 mechanism that depends on the expression of receptors only on the target cells [28,29]. In  
71 contrast, EFF-1 and AFF-1 are bilateral fusogens- their presence is required on the  
72 membranes of both apposing cells to mediate fusion [6,16,18,30,31]. These two fusogens can  
73 act in either a homotypic or a heterotypic manner [6,16,18,21] and mediate heterotypic cell  
74 fusion of Sf9 insect and Baby Hamster Kidney (BHK) cells [6,16]. Finally, VSV viruses  
75 containing a *GFP* substituting the *VSV-G* coding sequence (*VSVΔG*) [32,33] that are coated  
76 with AFF-1 (*VSVΔG-AFF-1*) specifically infect AFF-1 or EFF-1 expressing BHK cells [6]. Thus,  
77 in contrast to the pseudotyped virus coated with the native, unilateral G glycoprotein (*VSVΔG-*  
78 *G*), infection by *VSVΔG-AFF-1* requires fusogen expression on the host cell membrane. To  
79 date, however, *VSVΔG* coated with AFF-1, EFF-1 or any other non-viral fusogen have not  
80 been tested for infection in a living organism. Recently *VSVΔG-G* was demonstrated to infect  
81 living *C. elegans* [7,34]. Given that: (i) *VSVΔG-AFF-1* requires a fusogen on the target cell for  
82 infection, (ii) a detailed cellular atlas of AFF-1 and EFF-1 expression and function in *C. elegans*  
83 is known and (iii) *C. elegans eff-1* and *aff-1* mutants are available, we test whether *VSVΔG-*  
84 *AFF-1* can be retargeted to specific cells in living *C. elegans*. We found that *AFF-1*-coated  
85 viruses infect *C. elegans* and specifically target cells that express functional EFF-1 or AFF-1.  
86 Furthermore, *AFF-1*-coated pseudoviruses can be redirected to mononucleated body wall  
87 muscles (BWMs) that ectopically express EFF-1. Thus, the new delivery system enabled us  
88 to observe that EFF-1-induced BWMs merger and formation of non-functional syncytial  
89 muscle fibers, demonstrating the consequences of aberrant muscle fusion in an animal that  
90 normally uses mononucleated muscles for gait. Based on our results, we propose that in *C.*  
91 *elegans* a layer of longitudinal mononucleated muscles electrically coupled by gap junctions  
92 efficiently mediate wavelike movement and ectopic fusion disrupts the morphology and  
93 physiology of the muscular system. We also suggest additional applications for *VSVΔG-AFF-*  
94 *1* including finding new fusogens and fusogen-expressing tissues, studying fusogen-fusogen  
95 interactions and fusogen-interacting proteins *in vivo*, studying neuronal regeneration  
96 processes and using specific cell-delivery approaches for other viruses such as coronaviruses  
97 and retroviruses in *C. elegans* and in other organisms.

98

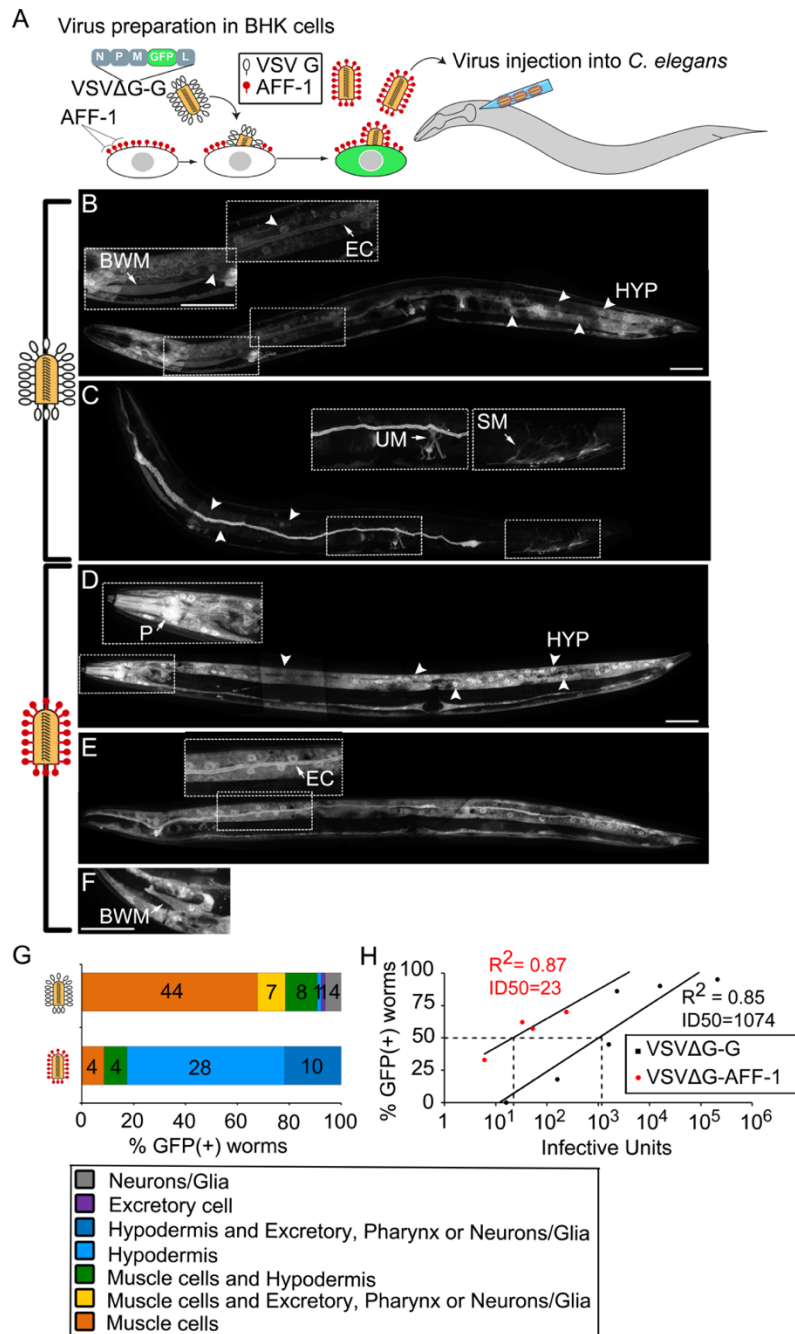

99  
100

**Figure 1. VSVΔG-AFF-1 and VSVΔG-G have different tropisms**

102 **(A)** BHK cells expressing AFF-1 (red pins) were infected with VSVΔG-G. The viral genome  
 103 encodes GFP replacing VSV-G (white pins). GFP(+) (green), infected cells. VSVΔG-AFF-1  
 104 pseudoviruses were harvested from the supernatant, titrated and microinjected into *C.*  
 105 *elegans*. **(B-F)** Confocal Z-stack projections of *drh-1* worms injected with VSVΔG-G (2300-  
 106 16000 IU) or VSVΔG-AFF-1 (33-240 IU) and imaged 48-72 h later (VSVΔG-G, n=65; VSVΔG-  
 107 AFF-1, n=46 from 5 and 6 independent experiments respectively). Images and their insets are  
 108 dot boxed. Arrowheads, hypodermal (HYP) nuclei. Arrows, infected cell. BWM-Body Wall  
 109 Muscle, UM-Uterine Muscle, SM-Stomatointestinal Muscle, EC-Excretory Cell, P-Pharynx.  
 110 Scale bars, 50 μm. **(G)** Distribution of worms with specified infected, GFP(+) cell types. **(H)**  
 111 Fraction of GFP(+) worms injected with indicated IU of VSVΔG-G or VSVΔG-AFF-1. Each dot  
 112 represents an independent experiment (n=10-28 worms per experiment). R<sup>2</sup> and the IU doses  
 113 producing 50% GFP(+) worms (ID<sub>50</sub>) are indicated. See also Figure S1.

114 **Results**

115 **VSV $\Delta$ G-AFF-1 and VSV $\Delta$ G-G infect mostly hypodermal and muscle cells respectively**

116 Wildtype, recombinant or pseudotyped VSV has been shown to infect rodents, fish, farm  
117 animals, and primates [1,35–37]. Recently, VSV $\Delta$ G-G was shown to infect *C. elegans* [7].  
118 Previously, pseudotyped VSV expressing the *C. elegans* somatic fusogen AFF-1 (VSV $\Delta$ G-  
119 AFF-1) was shown to infect AFF-1 or EFF-1 expressing BHK cells [6], but was not tested in a  
120 living organism. To test whether pseudotyped VSV $\Delta$ G-AFF-1 [6,33,38] can infect *C. elegans*,  
121 we prepared a recombinant VSV strain encoding the fluorescent reporter GFP, coated by AFF-  
122 1 fusion protein (VSV $\Delta$ G-AFF-1). Briefly, BHK cells expressing AFF-1 were infected with  
123 VSV $\Delta$ G-G helper virus (Fig. 1A). Newly generated virions were coated by plasma membrane-  
124 bound AFF-1, thereby producing VSV $\Delta$ G-AFF-1 pseudotyped viruses. Then, we titered the  
125 viruses determining the number of viral Infective Units (IU)/ml in BHK-AFF-1 cells. Finally,  
126 VSV $\Delta$ G-AFF-1 viruses were injected into worm's pseudocoelom; a body cavity filled with fluid  
127 that surrounds the internal organs. We expected that virus injected into the pseudocoelom will  
128 encounter different cells inside the worm (Figure 1A). Worms were injected with VSV $\Delta$ G-AFF-  
129 1 that was pre-incubated with  $\alpha$ VSV-G antibody (see materials and methods and Figure S4),  
130 VSV $\Delta$ G-G (as a positive control) or DMEM medium (as negative control). We used *drh-1(-)*  
131 (Dicer Related Helicase -1) mutant worms, as they are more susceptible to VSV infection and  
132 do not have any observable phenotypes [7,34]. Taken that VSV-G works unilaterally, while  
133 AFF-1 and EFF-1 fusogens have to be present in both fusing membranes [6,16,18,30], we  
134 hypothesized that VSV $\Delta$ G-G and VSV $\Delta$ G-AFF-1 will produce different infection patterns.  
135 Hence, we characterized and compared the GFP positive (GFP(+)) cells infected by VSV $\Delta$ G-  
136 G or VSV $\Delta$ G-AFF-1. VSV $\Delta$ G-G preferentially infected muscle cells, including BWM [7], uterine  
137 muscles (UM) and stomatointestinal muscles (SM, Figures 1B and 1C). VSV $\Delta$ G-G also  
138 infected the epidermal cells (hypodermis, HYP), excretory canal cell (EC, Figure 1B), glia and  
139 neurons in the head (Figures S1A-S1C). In contrast, VSV $\Delta$ G-AFF-1 infected mostly HYP cells  
140 (Figure 1D), and also excretory cell (Figure 1E) pharyngeal muscles (P) (Figure 1D), BWM  
141 (Figure 1F) and head neurons and glia (Figures S1D-S1F). VSV $\Delta$ G-G infects muscles that do  
142 not express any known fusogen (67% of infected, GFP(+) worms had only BWM infection),  
143 whereas VSV $\Delta$ G-AFF-1 mainly infects the EFF-1-expressing hypodermis (61% of GFP(+)  
144 worms had only hyp infection) (Figure 1G). Moreover, the calculated ID50 (infection dose  
145 producing 50% GFP(+) worms) for VSV $\Delta$ G-G and VSV $\Delta$ G-AFF-1 were approximately 1000  
146 and 20 IU respectively (Figure 1H). Therefore, VSV $\Delta$ G-AFF-1, a virus pseudotyped with a  
147 bilateral fusogen, can efficiently infect a multicellular organism such as *C. elegans*. Moreover,  
148 VSV $\Delta$ G-AFF-1 and VSV $\Delta$ G-G are specialized for different cellular targets and have different  
149 infectivity levels.

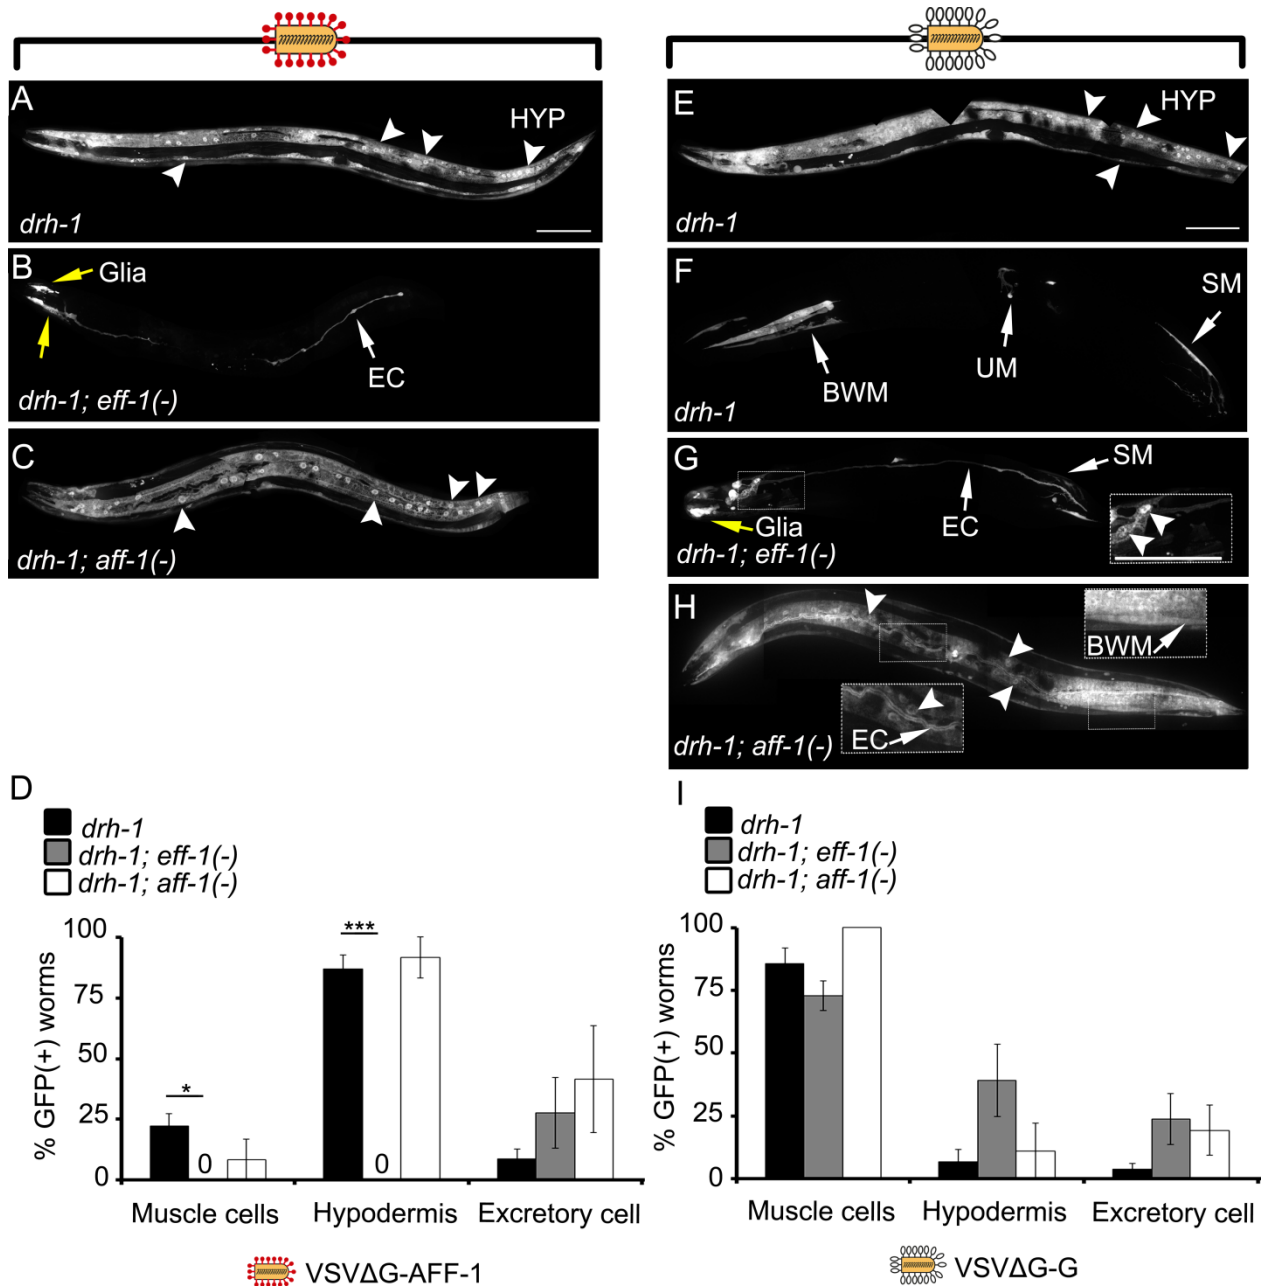

150

151

152 **Figure 2. VSVΔG-AFF-1 requires EFF-1 on target cells for infection**

153 (A-C) Confocal Z-stack projections of *C. elegans* infected with VSVΔG-AFF-1 (33-240 IU) and  
 154 imaged 48 h later. *drh-1* (n=46), *drh-1;eff-1(-)* (n=15) and *drh-1;aff-1(-)* (n=10).

155 (D) Fraction of GFP(+) worms from (A-C).

156 (E-H) Confocal Z-stack projections of *C. elegans* infected with VSVΔG-G (2300-4700 IU) 48  
 157 h post-injection. *drh-1* (n=56), *drh-1;eff-1(-)* (n=39) or *drh-1;aff-1(-)* (n=15).

158 (I) Fraction of GFP(+) worms from (E-H).

159 Arrowheads, HYP nuclei. Arrows, infected cell. See Figure 1 for cell types. Scale bars, 100  
 160 μm. Error bars represent mean ± SEM. \*p<0.05, \*\*\*p<0.001 (Student's t- test).

161 See also Figure S2.

162

### 163 **VSV $\Delta$ G-AFF-1 requires EFF-1 in host cells for infection**

164 We showed that cells infected by VSV $\Delta$ G-AFF-1 included hypodermis, excretory cell, neurons  
165 in the head, glia and pharyngeal cells. It is known that in adults pharyngeal cells, head  
166 neurons, glia and hypodermal cells express EFF-1 [14], while pharyngeal cells, excretory duct  
167 cell and glia express AFF-1 [18,21] and lastly, excretory cell, head neurons, hypodermal cells  
168 and pharyngeal cells express EFF-2, a recent duplication of EFF-1 with unknown function  
169 (BG, Oren-Suissa and BP unpublished data). Importantly, BWM cells that do not express any  
170 known fusogen in *C. elegans* were infected by VSV $\Delta$ G-AFF-1 in only 9% of the worms  
171 compared to 67% of the worms infected with VSV $\Delta$ G-G (Figure 1G). These findings suggest  
172 that infection of living *C. elegans* by VSV $\Delta$ G-AFF-1 follows a bilateral action mechanism, and  
173 that VSV $\Delta$ G-AFF-1 is capable of interacting with several members of the fusexin family on the  
174 target cell. Therefore, we hypothesized that EFF-1-expressing hypodermal cells could not be  
175 infected by VSV $\Delta$ G-AFF-1 in the absence of EFF-1, while cells expressing AFF-1 or EFF-2  
176 would still be targeted. To test this hypothesis, we injected either VSV $\Delta$ G-G or VSV $\Delta$ G-AFF-  
177 1 into the pseudocoelom of wt, null *eff-1(ok1021)* mutants (*(eff-1(-);[14]*), null *aff-1(tm2214)*  
178 mutants (*(aff-1(-);[18]*) or putative null *eff-2(hy51)* (*eff-2(-)*; see materials and methods) worms,  
179 and quantified the percentage of worms with GFP(+) cells. We detected VSV $\Delta$ G-AFF-1  
180 infected hypodermal cells in *eff-1(+)* (Figure 2A) but not in *eff-1(-)* worms (Figure 2B), while  
181 GFP(+) excretory and glia cell were detected even in the absence of EFF-1 (Figure 2B). *aff-*  
182 *1(-)* worms had GFP(+) hypodermal cells as in wildtype (Figure 2C). Overall, the fraction of  
183 worms showing VSV $\Delta$ G-AFF-1-infected hypodermal cells was similarly high in wildtype and in  
184 *aff-1(-)* (87% and 92% for wt and *aff-1(-)*, respectively) but was absent in *eff-1(-)* mutants  
185 (Figure 2D). In addition, muscles were inefficiently infected in wildtype and *aff-1(-)* mutants,  
186 and not infected in *eff-1(-)* animals (Figure 2D). The fraction of worms with GFP(+) excretory  
187 cells was not significantly different in all backgrounds (Figure 2D). Finally, the fraction of  
188 worms with GFP(+) glia/neuron cells was significantly higher in *eff-1(-)*, compared to wt and  
189 *aff-1(-)* animals (Figures S1D-S1F). Moreover, *eff-2(-)* and wildtype animals were similarly  
190 infected in their hypodermal, muscle and excretory cells (Figure S2). These results show that  
191 VSV $\Delta$ G-AFF-1 requires EFF-1 expressed on hypodermal cells, for their infection. Moreover,  
192 we show evidence for AFF-1-EFF-1 bilateral heterotypic interactions *in vivo*.

193 EFF-1 mediates formation of hyp7 syncytium by fusing 139 hypodermal cells during  
194 embryonic and larval development and *eff-1(-)* worms have mononucleated hypodermal cells  
195 instead of this syncytium [14]. To exclude the possibility that hypodermal cells of *eff-1(-)* worms  
196 have a reduced susceptibility to viral infection, we injected wt, *aff-1(-)* and *eff-1(-)* worms with  
197 VSV $\Delta$ G-G. We found that wild-type worms injected with VSV $\Delta$ G-G, presented a full body-  
198 length covered by infected hypodermal cells along with muscles and excretory cells (Figures



199 2E-2F), while *eff-1(-)* worms had only few GFP(+) hyp nuclei localized closer to the injection  
200 region- the head, as well as muscles and excretory cells (Figure 2G). *aff-1(-)* worms had  
201 hypodermal infection similar to wt animals (Figure 2H). Yet, the fraction of worms injected with  
202 VSV $\Delta$ G-G that showed GFP(+) muscle and hypodermal cells was not significantly different in  
203 wt, *eff-1(-)* and *aff-1(-)* backgrounds (Figure 2I). Finally, we observed a small fraction of worms  
204 with GFP(+) glia/neurons in the head with no significant difference between all tested  
205 backgrounds (Figures S1A-S1C). Thus, hypodermal cells are not compromised for VSV $\Delta$ G-G  
206 infection even in the absence of EFF-1. In addition, VSV $\Delta$ G-G with its unilateral viral fusogen  
207 infects different cells including muscles, hypodermis, excretory cell, and glia/neurons in an  
208 EFF-1- and AFF-1-independent manner. This is in contrast to VSV $\Delta$ G-AFF-1 that uses a  
209 bilateral mechanism and infects cells that normally express EFF-1 or AFF-1 in adult animals.  
210

### 211 **VSV $\Delta$ G-AFF-1-mediated infection depends on *eff-1* activity in target cells**

212 We have shown VSV $\Delta$ G-AFF-1 fails to infect hypodermal cells in *eff-1(-)* animals (Figure 2).  
213 To study whether conditional induction of *eff-1* can trigger infection by VSV $\Delta$ G-AFF-1 we  
214 varied the dosage of *eff-1* using temperature shifts in a conditional temperature sensitive (*ts*)  
215 mutant [14,25]. In *eff-1(hy21ts)* animals grown at the permissive 15°C, most epidermal cells  
216 fuse to form multinucleated hypodermis and vulva [14]. However, when *eff-1(hy21)* animals  
217 are grown at the restrictive 25°C, epidermal cells fail to fuse, producing phenotypes similar to  
218 the null *eff-1(ok1021)* worms [16]. Therefore, *eff-1(ts)* worms can serve as a temperature  
219 inducible system for modification of EFF-1 dosage *in vivo* [14,19,25]. To obtain varying  
220 expression of EFF-1, we maintained *eff-1(ts)* animals at 15°C, 25°C or performed 25°C to  
221 15°C downshifts at different developmental stages and then injected VSV $\Delta$ G-AFF-1 into  
222 young adult worms (Figure 3A). Wildtype worms in all experimental conditions had GFP(+) hyp  
223 nuclei spanning the worm's body from head to tail (Figures 3B-3E), while *eff-1(ts)* animals  
224 maintained at the restrictive temperature and then shifted down from 25°C to 15°C, had a  
225 gradual increase in infected GFP(+) hyp cells (Figures 3F-3I). In wt worms maintained in all  
226 conditions, the number of GFP(+) hypodermal nuclei was about 69, consistent with the number  
227 of hyp7 nuclei found on one side of the animals body [39,40]. In contrast, for *eff-1(ts)*, the  
228 longer time the worms developed at the permissive temperature (15°C), the more GFP(+) hyp  
229 nuclei were scored (Figure 3J). Thus, hypodermal infection by VSV $\Delta$ G-AFF-1 increases with  
230 conditional induction of *eff-1*.

231

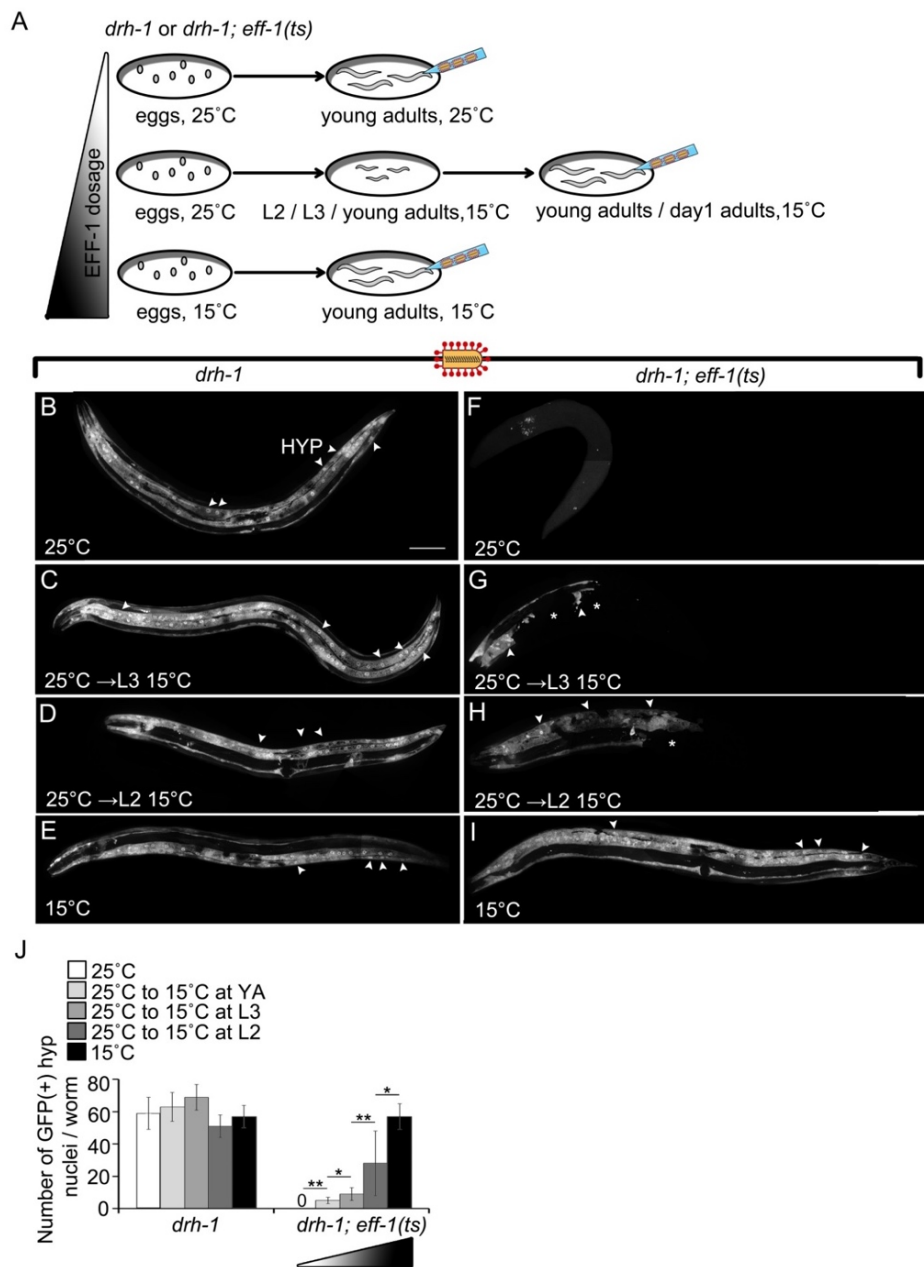

232

233

234 **Figure 3. Infection by VSVΔG-AFF-1 increases with induction of EFF-1 function**

235 **(A)** Wt or temperature sensitive *eff-1(ts)* animals were maintained at permissive (15°C) or  
 236 restrictive (25°C) temperatures for different times during their development. Each row  
 237 represents a different experimental condition. Blue needles indicate virus injection. L2, Larval  
 238 stage 2; L3, Larval stage 3.

239 **(B-I)** Confocal Z-stack projections of worms infected with VSVΔG-AFF-1. *drh-1* or *drh-1*;*eff-1(ts)*  
 240 animals were injected with VSVΔG-AFF-1 (7-125 IU) as adults, and imaged 48 h later.  
 241 Arrowheads, HYP nuclei. Asterisks, patches of GFP(-) surrounded by GFP(+) hypodermal  
 242 cells. Scale bar, 100 μm.

243 **(J)** Quantitation of experiments. Error bars average ± SEM. Student t-test. \**p*<0.05, \*\**p*<0.001.  
 244 *n*=3-10 worms per condition. Triangle, dosage of *eff-1*.

245

## 246 **Ectopic EFF-1 expression in BWMs produces dumpy and uncoordinated worms**

247 We demonstrated that VSV $\Delta$ G-AFF-1 specifically infects EFF-1 expressing cells and rarely  
248 infects muscle cells. In addition, EFF-1-dependent infection could be induced by EFF-1(ts)  
249 conditional expression in target cells (Figure 3). Hence, we propose that ectopic EFF-1  
250 expression in host cells, such as body wall muscles (BWMs), could retarget VSV $\Delta$ G-AFF-1  
251 into these cells. *C. elegans* has 95 mononucleated rhomboid BWMs, arranged as staggered  
252 pairs and bundled in four quadrants that run along the worm's body [41–43]. While most  
253 vertebrates and invertebrates have syncytial striated muscles composed of long  
254 multinucleated myofibers, in *C. elegans* and other nematodes the BWMs have not been  
255 described to fuse and do not form multinucleated myofibers  
256 (<https://www.wormatlas.org/hermaphrodite/muscleintro/MusIntroframeset.html>). Therefore,  
257 we hypothesized that EFF-1 expression in BWMs can induce their ectopic fusion, alter their  
258 structure, produce muscle-related phenotypes and increase VSV $\Delta$ G-AFF-1 infection of  
259 BWMs. First, we monitored animals with an extra-chromosomal array containing genomic  
260 EFF-1 under the muscle-specific *myosin-3* promoter (*myo-3p::EFF-1*), together with *myo-*  
261 *3p::mCherry* which labels cytoplasm and nuclei in BWMs, enteric, gonadal and vulval muscles.  
262 Most adult animals, including *myo-3p::mCherry* (+) and (-), were wild-type-like (Table S1,  
263 Figures 4A-4B and Movie S1), while about 10% of animals were both *myo-3p::mCherry*(+)  
264 and had an uncoordinated and dumpy (Unc+Dpy) phenotype (Table S1, Figures 4C-4D and  
265 Movie S1). Most *myo-3p::mCherry*(+), Unc+Dpy animals arrested during larval development  
266 (Table S1) with additional phenotypes including bridged BWMs behind the terminal bulb (0/12  
267 wt-like worms and 9/15 Unc+Dpy worms), mCherry-labeled aggregates that could be  
268 observed with DIC (0/12 wt-like worms and 9/15 Unc+Dpy worms) (Figures 4E-4H), *myo-*  
269 *3p::mCherry*(+) BWMs with clustered nuclei (3/12 wt-like worms and 9/15 Unc+Dpy worms)  
270 and elevated number of nuclei/ BWM cell ( $1.4\pm 0.2$  and  $2.2\pm 0.3$  nuclei/BWM cell in wt-like vs  
271 Unc+Dpy larvae respectively) (Figures 4E-4I). While ectopic *hsp::EFF-1* expression causes  
272 embryonic lethality [14,19,25], we found no difference between the fractions of *myo-*  
273 *3p::mCherry* (+) and (-) unhatched eggs (Table S1). Thus, EFF-1 expression in BWMs  
274 accounts for the Unc+Dpy phenotypes, larval arrest and clustered BWM nuclei, which  
275 supports the hypothesis that ectopic EFF-1 induces BWMs multinucleation by cell-cell fusion  
276 causing behavioral and morphological phenotypes.

277

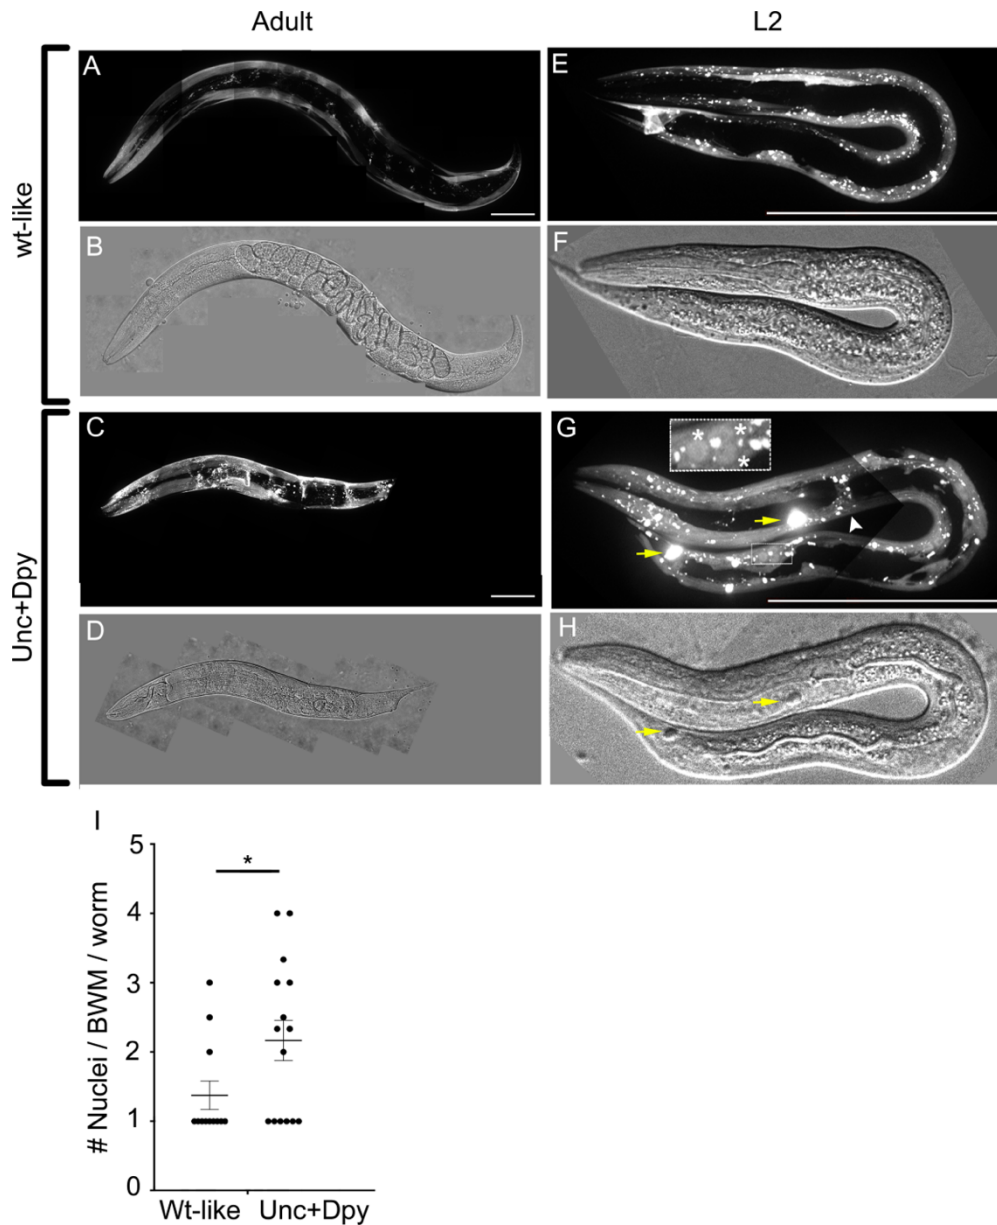

278

279 **Figure 4. EFF-1 expression in BWMs produces Unc+Dpy worms with multinucleated**  
 280 **cells**

281 (A-H) Images of fluorescent Z-stack projections and respective DIC of animals with  
 282 extrachromosomal *myo-3p::EFF-1*, *myo-3p::mCherry*. (G) White arrowhead, bridge formed  
 283 between 2 BWMs from opposing quadrants. Yellow arrows, *myo-3p::mCherry* accumulations  
 284 also in DIC (H). Asterisks, clustered nuclei within one BWM. Scale bars, 100  $\mu$ m.

285 (I) Number of nuclei per *myo-3p::mCherry* (+) BWM cell in L2s. wt-like (n=12); Unc+Dpy  
 286 (n=15). Each dot represents the average number of nuclei/BWM cell/worm. Total average  $\pm$   
 287 SEM for each phenotype. Two tailed Student's t-test  $p < 0.05^*$ .

288 See also Table S1.

289

290 **EFF-1 expression in BWMs induces their fusion and retargets VSV $\Delta$ G-AFF-1 to muscles**

291 To determine whether EFF-1 expression in BWMs can induce their fusion, we imaged BWMs  
 292 expressing a membrane-bound YFP (MB::YFP), *myo-3p::EFF-1* and *myo-3p::mCherry*, (see  
 293 materials and methods). BWMs of wt-like worms have a normal spindle-shaped morphology

294 with cellular membranes between adjacent BWMs showing different levels of cytoplasmic  
295 *myo-3p::mCherry* (as *myo-3p::mCherry* is an extrachromosomal array) (Figures 5A-5C). In  
296 contrast, *Unc+Dpy* worms had disordered muscle fiber structure, the membranes surrounding  
297 the BWMs were indistinguishable and the BWMs showed an evenly distributed cytoplasmic  
298 *myo-3p::mCherry* indicating fusion and content mixing between these cells during  
299 development (Figures 5D-5F). Thus, EFF-1 expression in BWMs induces disappearance of  
300 cellular membranes and cytoplasmic merger, suggesting that EFF-1-mediated cell-cell fusion  
301 alters BWM structure, likely resulting in *Unc+Dpy* and larval arrest phenotypes.

302 We showed that VSV $\Delta$ G-AFF-1 infects EFF-1-expressing hypodermal cells in >80%  
303 of the infected worms but infects muscle cells that do not express EFF-1 in about 20% of the  
304 infected animals (Figure 2D). Moreover, EFF-1 expression in BWMs induced their fusion, and  
305 generated *Unc+Dpy* worms (Table S1, Movie S1 and Figures 4A-4D and 5A-5F). Taken that  
306 EFF-1 and AFF-1 are bilateral fusogens and VSVG is a unilateral fusogen, we hypothesized  
307 that ectopic expression of EFF-1 in BWMs would increase their infection by VSV $\Delta$ G-AFF-1  
308 but not by VSV $\Delta$ G-G. Therefore, we injected either VSV $\Delta$ G-AFF-1 or VSV $\Delta$ G-G into the  
309 pseudocoelom of worms ectopically expressing EFF-1 and mCherry in BWMs and imaged  
310 them. For VSV $\Delta$ G-AFF-1 but not for VSV $\Delta$ G-G, the fraction of infected BWMs was significantly  
311 higher in *Unc+Dpy* worms (expressing the *myo-3p::mCherry* marker) compared to wt-like  
312 (expressing the *myo-3p::mCherry* marker) and wt animals (Figure 6). Thus, EFF-1 expression  
313 in BWMs retargets VSV $\Delta$ G-AFF-1 into muscles but does not affect the natural VSV $\Delta$ G-G  
314 tropism for BWMs.

315 We showed that VSV $\Delta$ G-AFF-1 infects neuron and glia cells in the head (Figures S1D-  
316 S1F). In order to assess the infection of other fusogen-expressing neurons, we chose the  
317 arborized neuron pair PVD, previously shown to express EFF-1, which spans the length of the  
318 worm [25], VSV $\Delta$ G-AFF-1-infected PVD cells were not observed. Nevertheless, we found 3  
319 wt animals (out of >100 infected worms), where PVD cells were infected with VSV $\Delta$ G-G  
320 following injections with high dosage of pseudotyped viruses (Movie S2). Moreover, we tested  
321 whether ectopic AFF-1 expression in PVD or ectopic EFF-1 expression in 12 mechanosensory  
322 and chemosensory neurons in *eff-1(ts)* background at the restrictive 25°C, could induce  
323 VSV $\Delta$ G-AFF-1 infection in these cells. None of these treatments produced VSV $\Delta$ G-AFF-1  
324 infection in the neurons ectopically expressing EFF-1 or AFF-1 (Figure S3 and Table S2).  
325 There are several possibilities to explain why VSV $\Delta$ G-AFF-1 did not infect these neurons; (i)  
326 relatively low titer of VSV $\Delta$ G-AFF-1 preps, (ii) a physical barrier such as hypodermis, sheath  
327 cells or glia cells that surround neurons or (iii) diffusion of the GFP signal in long neuronal  
328 processes.

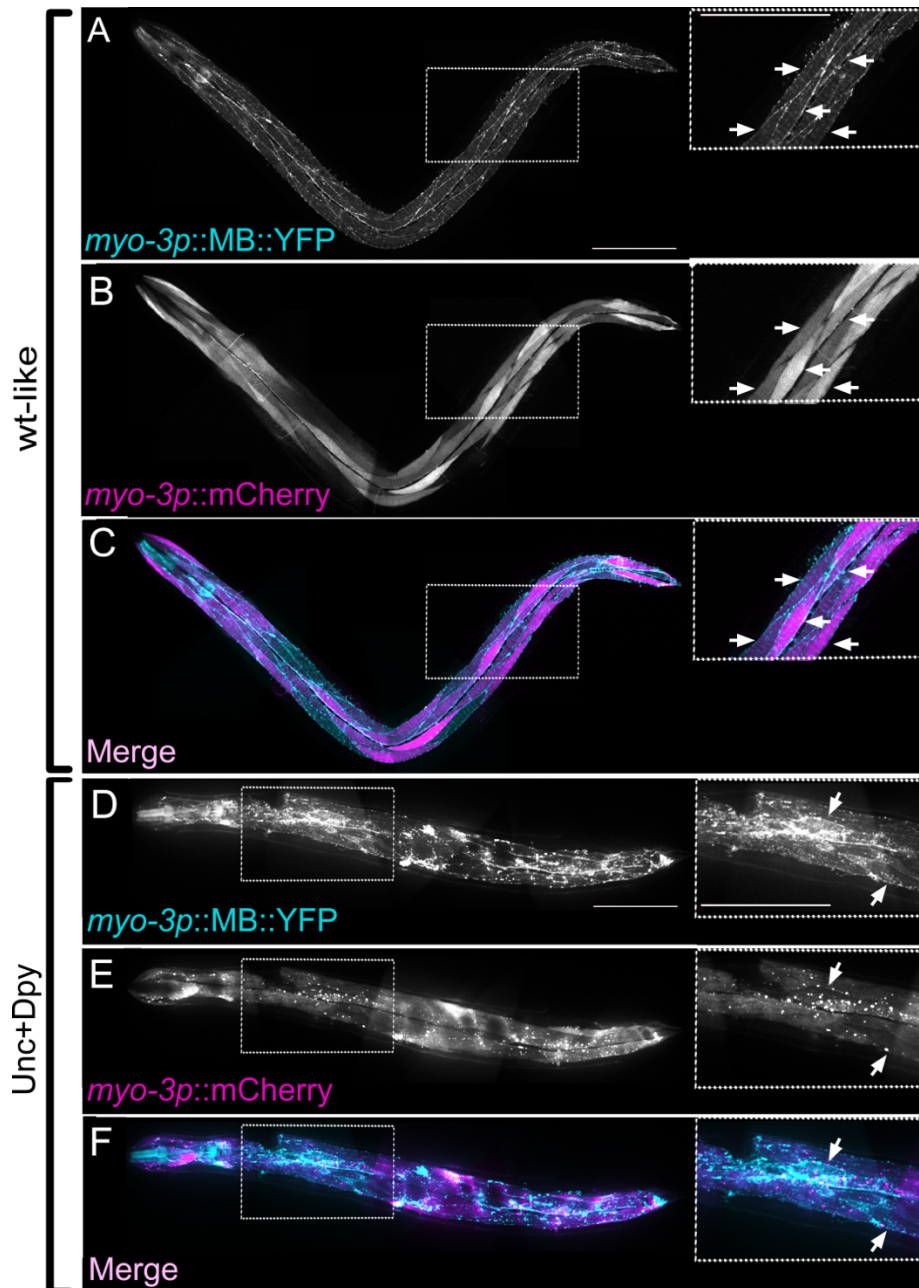

329

330

331 **Figure 5. EFF-1 expression in BWMs induces their fusion**

332 (A-C) Confocal images of wt-like adult worms with membrane bound (MB) *myo-3p::MB::YFP*

333 (cyan) and extrachromosomal array containing *myo-3p::EFF-1*, *myo-3p::mCherry* (magenta).

334 (D-F) Confocal images of Unc+Dpy [*myo-3p::MB::YFP* (cyan); *myo-3p::EFF-1*, *myo-*

335 *3p::mCherry*]. Arrows, unfused BWMs with MB (cyan). Note only two unfused BWMs, all the

336 others appear fused with no MB separating them. Insets correspond to white-dotted area.

337 Scale bars 100  $\mu$ m.

338 See also Movie S1.

339

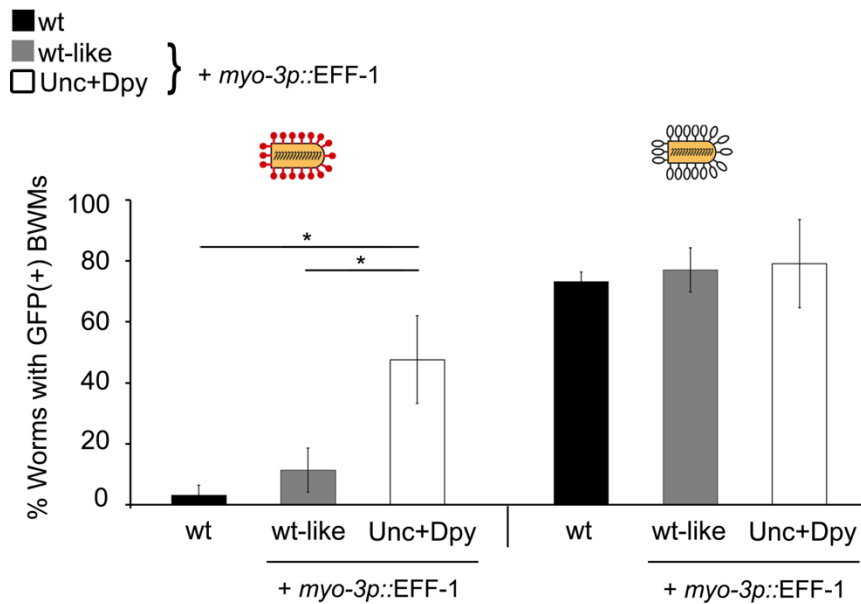

340

### 341 **Figure 6. Retargeting of VSVΔG-AFF-1 to body wall muscle cells**

342 Wild-type worms and animals with extrachromosomal array containing *myo-3p::EFF-1* and  
343 *myo-3p::mCherry* were injected with VSVΔG-AFF-1 (35-63 IU, red pins; n=39 wt, n=50 wt-like  
344 and n=27 Unc+Dpy worms) or VSVΔG-G ( $3 \times 10^5$  IU, white pins; n=30 wt-like and 14 Unc+Dpy)  
345 respectively. Wt worms injected with VSVΔG-G (2300-4700 IU, n=56) were taken from figure  
346 2I. Animals were analysed by SDC microscopy. Data represents average percentage of  
347 worms with GFP(+) BWMs  $\pm$  SEM. Student's t-test: \*p<0.05.  
348

### 349 **EFF-1 expression in fused BWMs enables VSVΔG-AFF-1 and VSVΔG-G spreading**

350 Based on the aberrant muscle fusion phenotype seen in Unc+Dpy worms following EFF-1  
351 expression in BWMs, we hypothesized that viral spreading through such novel BWM syncytia  
352 would be enhanced. To test this hypothesis, we injected VSVΔG-AFF-1 or VSVΔG-G into wt-  
353 like or Unc+Dpy worms and quantified the number of BWM cells that were either (i) mCherry(+)  
354 only (expressing EFF-1 and *myo-3p::mCherry*(+)), (ii) GFP(+) only (infected but not  
355 expressing EFF-1) or (iii) mCherry(+) and GFP(+) expression in the same cells (infected and  
356 expressing EFF-1). We found that for both VSVΔG-AFF-1 and VSVΔG-G, wt-like worms had  
357 individual GFP(+) BWM cells, that were mostly mCherry (-) (Figures 7A-7F, arrows), while  
358 Unc+Dpy animals had continuous GFP(+) BWMs that overlapped with mCherry along their  
359 body length (Figures 7G-7L, dashed lines and arrows). Compared to wt-like animals, the  
360 Unc+Dpy worms had about five-times fewer non-infected mCherry(+) only BWMs, a similar  
361 number of infected-GFP(+) only cells and about fifteen-fold more infected BWM cells that also  
362 express mCherry (Figures 7M-7N). Lastly, Unc+Dpy worms had ~2.5 nuclei per VSVΔG-AFF-  
363 1- or VSVΔG-G- infected BWMs, compared to wt-like animals with 1 nucleus per BWM cell  
364 (Figures 7O-7P). Therefore, EFF-1 expression in BWMs transforms mononucleated BWMs  
365 into syncytial muscle fibres enabling viral spreading within the fused cells and increasing the  
366 number of both VSVΔG-AFF-1- and VSVΔG-G-infected BWM cells.

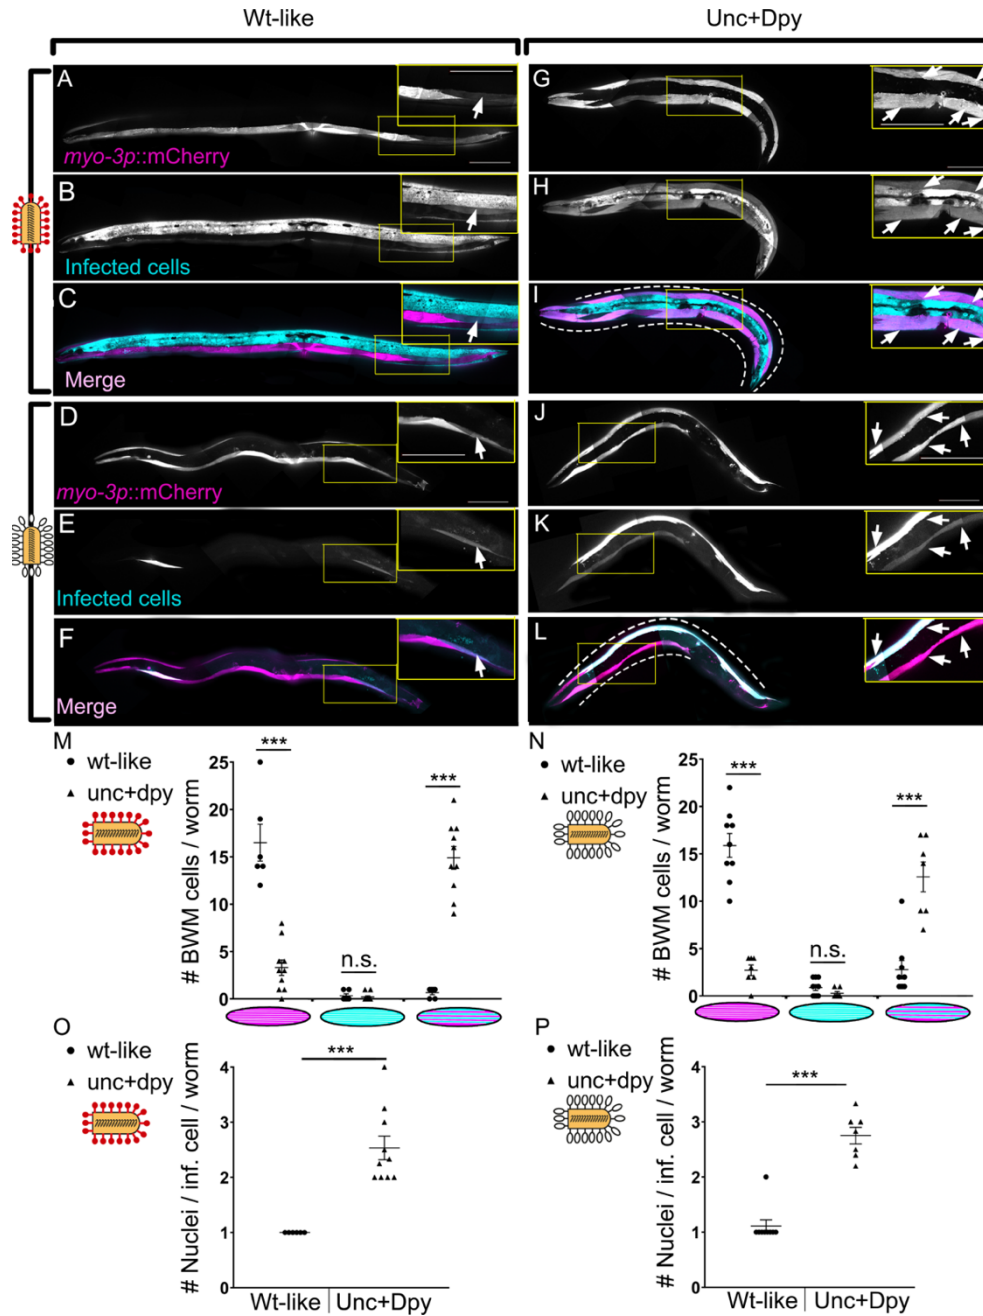

367

368 **Figure 7. EFF-1 expression in BWM enables VSV $\Delta$ G-AFF-1 and VSV $\Delta$ G-G spreading**  
 369 **along fused muscles**

370 (A-L) Z-stack projections of wt-like (A-F) and Unc+Dpy animals (G-L) expressing *myo-*  
 371 *3p::EFF-1* and *myo-3p::mCherry* infected with VSV $\Delta$ G-AFF-1 (35-63 IU red pins) or VSV $\Delta$ G-  
 372 G ( $3 \times 10^5$  IU; white pins). Insets and their corresponding images (yellow frames). Arrows,  
 373 individual infected (cyan) BWMs. Dashed lines outline grouped BWMs that express *myo-*  
 374 *3p::mCherry* and *myo-3p::EFF-1* (magenta) and infected with virus (cyan) showing spreading  
 375 of GFP. Scale bars, 100  $\mu$ m. (M-N) Number of BWM cells/worm expressing EFF-1 (magenta  
 376 cell), infected (cyan cell) or expressing EFF-1 and infected (magenta and cyan). wt-like  
 377 (circles) and Unc+Dpy (triangles). Each point represents a single worm. (O-P) Quantitation of  
 378 multinucleation of infected BWMs. Each dot represents an average number of nuclei/ GFP(+)  
 379 BWM, calculated from 1-6 multinucleated BWMs of a single worm. (M and O) wt-like n=6 and  
 380 Unc+Dpy n=10 animals. (N and P) wt-like n=9 and Unc+Dpy n=7 animals.  
 381 Black horizontal lines, average  $\pm$  SEM. Student's t-test, \*\*\*  $p < 0.0001$ ; n.s., not-significant.



## 382 **Discussion**

### 383 **Utilizing VSV $\Delta$ G-AFF-1 to study muscle fusion and muscle fusogens**

384 Myogenesis of striated muscle involves the formation of multinucleated myofibers by  
385 myoblast-myoblast fusion. Myoblast fusion is also essential for muscle tissue patterning,  
386 maintenance and damage repair [62,63]. In contrast, *C. elegans* BWMs do not fuse and exist  
387 as mononucleated cells, contracting in synchrony that mediate gait [64]. We used VSV $\Delta$ G-  
388 AFF-1 to label EFF-1-expressing BWMs and found that EFF-1-mediated BWMs fusion results  
389 in loss of coordination, although we did not determine whether the observed locomotory  
390 defects result from aberrant joining of separately-innervated muscles or from a loss of  
391 contractility. These results demonstrate that a locomotory circuit may be optimally adjusted for  
392 both separate (as in *C. elegans*) and syncytial (as in vertebrate) striated muscles. Indeed,  
393 failure of myoblast fusion in vertebrates may have equally severe phenotypes [47,48]. Despite  
394 the importance of muscle fusion, the studies of muscle fusion proteins are just emerging [55–  
395 58]. We suggest that VSV $\Delta$ G-AFF-1 can be used in screens to identify additional muscle  
396 fusogens in invertebrates (e.g. *Drosophila*). Alternatively, viruses coated with the bilateral  
397 Myomaker, can be a tool to screen for muscle-expressed Myomaker-interacting proteins in  
398 vertebrates.

399

### 400 **VSV $\Delta$ G-AFF-1 infects, and can be retargeted to muscles expressing EFF-1 or AFF-1**

401 Previously described viral-vector-based systems used viral unilateral fusogens to target  
402 desired cells. For instance, fusogens that are either native, modified or from different viral  
403 origin, change the specificity of the viruses targets and facilitate the delivery process [1–3]. In  
404 addition, a potent targeting of cancer cell lines was achieved with adenovirus (non-enveloped  
405 virus) armed with an adaptor composed from 2 designed ankyrin repeat proteins (DARPs),  
406 one binding to the viral fiber knob and the second binding to cancer-specific markers [44]. Our  
407 work presents a new approach to retarget viral vectors into muscle cells, based on viruses  
408 coated with a nematode bilateral fusogen, namely AFF-1 and expression of bilateral fusogens  
409 such as EFF-1/AFF-1 in desired host cells. VSV $\Delta$ G-AFF-1 has a high degree of specificity  
410 towards cells that express EFF-1/AFF-1 and can be redirected by expressing them on a  
411 certain cell (e.g. BWMs). Moreover, VSV $\Delta$ G-AFF-1-mediated infection can be manipulated  
412 quantitatively by changing the amount of a partner fusogen expressed on the target cells. VSV  
413 and VSV-pseudotypes successfully infect invertebrate and vertebrate cell-lines and model  
414 organisms [1,2,35–37]. Although EFF-1 and AFF-1 are not present, and have no known  
415 homologs in vertebrates, VSV $\Delta$ G-AFF-1 infects mammalian BHK cells expressing AFF-1/EFF-  
416 1 [6]. It will be interesting to test if VSV $\Delta$ G-AFF-1 can specifically target cells ectopically  
417 expressing AFF-1/EFF-1 in a vertebrate model. Similarly, pseudotyped VSV $\Delta$ G-SARS-CoV-

418 2-S-glycoprotein [4] could be targeted to humanized worms or mice expressing hACE2 to  
419 study entry mechanisms, pathogenesis and potential treatments for viral infections, including  
420 COVID19 in model organisms.

421

#### 422 **Additional applications for VSV $\Delta$ G-AFF-1**

423 In the recent decade, extracellular vesicles (EVs) emerged as intercellular communication  
424 carriers, containing variable cargoes (e.g lipids, DNA, RNA, toxins and proteins) and involved  
425 in different biological processes including cell-cell interactions, cancer, tissue and neuronal  
426 regeneration. EVs can serve as biomarkers and are potent vehicles for gene and drug delivery  
427 [26,45,46]. However, work with EVs-based vectors has to tackle the issues of specific  
428 targeting, loading of desired cargo, presence of undesired/non-specific content and  
429 quantification of produced EVs. Our system consisting of enveloped pseudotyped virus coated  
430 with bilateral fusogens and host muscle cells expressing bilateral fusogens, demonstrates cell-  
431 specific targeting. Moreover, VSV $\Delta$ G-AFF-1 has the benefits of viral-based vectors, namely  
432 loading a specific and tailored cargo including fluorescent markers such as GFP-coding RNA  
433 sequence, simple vector quantification and cargo amplification within the host cell. Therefore,  
434 VSV $\Delta$ G-AFF-1 may serve as a paradigm for EVs-mediated transport. It can be utilized to  
435 explore how EVs deliver their cargoes and to study whether and how EVs are involved in  
436 different biological processes.

437 Exoplasmic membrane fusion is a fundamental biological process involved in  
438 myogenesis, fertilization, vulva development, bone formation and resorption, hypodermis  
439 morphogenesis, placentation, tubulogenesis, neuronal regeneration and viral infection  
440 [28,31,47,48]. Despite the importance of these processes, very few cell-cell fusogens have  
441 been identified and characterized so far. These include: (i) Syncytins involved in placenta  
442 formation [49–51]; (ii) Fusexins including EFF-1 and AFF-1 from *C. elegans* [14,17–22,31] and  
443 HAP2/GCS1 which mediates gamete fusion in protists and flowering plants [38,52–54] and  
444 (iii) Myomaker (TMEM8c) and myomerger (myomixer/minion) proteins that fuse muscle cells  
445 in vertebrates [55–58]. We demonstrate that VSV $\Delta$ G-AFF-1 injected into *C. elegans*  
446 encounters and infects different EFF-1/AFF-1-expressing cells. Ectopic expression of EFF-1  
447 in BWMs induces these mononucleated muscles to form syncytial myofibers, however, these  
448 multinucleated muscles are pathological and the worms become deformed and paralyzed.  
449 Moreover, bilateral heterotypic fusion has been described between EFF-1 and AFF-1 and also  
450 between EFF-1 and sperm HAP2/GCS1 from *Arabidopsis* expressed on two populations of  
451 BHKs [38]. Therefore, VSV $\Delta$ G-AFF-1/EFF-1 may be exploited in screens to identify new  
452 bilateral fusogens or fusogen-interacting proteins in different organisms and to understand

453 how and why some myoblasts fuse (e.g. skeletal muscles) while others function optimally as  
454 individual mononucleated cells (e.g. smooth muscles and BWMs).  
455

## 456 **Materials and methods**

### 457 **Nematode strains**

458 Unless otherwise stated, all nematodes were maintained at 20°C, according to standard  
459 protocols [65,66]. *drh-1(tm1329)* served as the wild type background. Mutations and strains  
460 that were used in this study are listed in Table S3.

461

### 462 **DNA constructs**

463 The *myo-3p::EFF-1* plasmid was constructed by cloning the *myo-3* promoter region from *myo-*  
464 *3p::mCherry* plasmid with Sal I (New England BioLabs Cat#R3138) and Nhe I (ThermoFisher  
465 Cat# FD0974) and inserting it into the *hsp16-2::EFF-1* plasmid cut with the same enzymes to  
466 replace the original heat shock promoter. To produce *eff-2 (hy51)* mutant worms with CRISPR,  
467 the following DNA constructs were generated:

- 468 1. pBG115 plasmid encoding single guide targeting *eff-2* to insert *mNeonGreen* was  
469 generated by cloning *eff-2* targeting sequence into the CAS9 plasmid pDD162 with BG84  
470 and BG85 primers.
- 471 2. BG123 conversion oligonucleotide encoding wt *pha-1* fragment was PAGE purified.
- 472 3. PCR amplicon encoding for the mNeonGreen and *unc-54* 3'UTR flanked by homology  
473 arms to the *eff-2* gene, generated by amplification of mNeonGreen from plasmid X, with  
474 BG129 and BG130 primers containing a 50 bp homology arms to *eff-2*.

475 Sequences of primers and oligonucleotides mentioned above are found in Table S3.

476

### 477 **Transgenic animals**

478 For standard extrachromosomal transgenes, germline transformation was performed using  
479 standard protocols [67]. Transgenic lines were kept as extrachromosomal arrays and  
480 maintained by following the expression from either *myo-3p::mCherry*, *myo-2p::GFP*, or *mec-*  
481 *4p::dsRed*, *odr-1p::dsRed* plasmids that were co-injected as transformation markers. *myo-*  
482 *3p::mCherry* encodes mCherry expression in body wall muscle and vulva muscle cells. *myo-*  
483 *2p::GFP* encodes GFP expression specifically expressed in pharyngeal muscles. *pmec-*  
484 *4::dsRed* encodes dsRed expression in six touch receptor neurons. *odr-1p::dsRed* encodes  
485 dsRed expression in two odor sensory neurons. Plasmids mentioned above and strains  
486 containing these arrays are listed in Table S3. Transgenic lines with extrachromosomal arrays  
487 were generated as follows:

- 488 • BP2126: *drh-1(tm1329);eff-1(hy21)* injected with 20ng/μl *pmyo-2::GFP* as  
489 transformation marker and 0.1ng/μl *pdes-2::AFF-1*.
- 490 • BP2131-3: *drh-1(tm1329);eff-1(hy21)* injected 10ng/μl *pmec-4::dsRed* and 10ng/μl  
491 *podr-1::dsRed* as transformation markers and to label sensory neurons, 1ng/μl *pmec-*  
492 *4::EFF-1* and 1ng/μl *podr-1::EFF-1*.
- 493 • BP2137: *drh-1(tm1329)* injected 10ng/μl *myo-3p::mCherry* as transformation marker  
494 and to label Body Wall Muscle cells, and 1ng/μl *myo-3p::EFF-1*.
- 495 *eff-2(hy51)* allele was generated by CRISPR/Cas9 [65,66] insertion of mNeonGreen into the  
496 first exon of *eff-2* gene. *pha-1* was used as a conversion marker. *pha-1(e2123)* temperature  
497 sensitive worms were injected with 50 ng/μl pBG115 targeting *eff-2* and containing CAS9, 50  
498 ng/μl pJW1285 sgRNA plasmid against *pha-1* that contains the CAS9, 20 ng/μl BG123  
499 conversion oligonucleotide encoding wt *pha-1* fragment and 20 ng/μl amplicon encoding for  
500 the mNeonGreen and *unc-54* 3'UTR flanked by homology arms to the *eff-2* gene. Worms that  
501 survived development at the restrictive temperature (25°C) were screened and sequenced for  
502 mutations in the *eff-2* gene. *hy51* is the result of an imprecise partial inverted insertion of the  
503 PCR fragment into the *eff-2* locus. One bp was deleted at position +31 and 488bp of the *unc-*  
504 *54* 3'UTR and mNeonGreen gene were inserted into *eff-2* coding region. The product of the  
505 inverted insertion is a non-functional fluorescent protein that causes a frame shift in *eff-2* and  
506 terminates its translation at Amino Acid #18. The *eff-2* targeting sequence was added to  
507 primers (see Table S3) and inserted to the linearized vector using restriction-free cloning  
508 technique.

509

### 510 **Live imaging of worms**

511 For imaging of viral infection and BWM fusion in *C. elegans*, worms were analyzed by  
512 Nomarski optics and fluorescence microscopy using Nikon eclipse Ti inverted microscope with  
513 Yokogawa CSU-X1 spinning disk confocal (SDC) as described previously [26,27]. Briefly,  
514 animals were anesthetized in 0.01-0.05% tetramisole in M9 solution for 20-30 min and then  
515 picked with an eyelash attached to a toothpick and transferred to a 5 μl droplet of M9 solution  
516 placed on 3% agar slide. Images were acquired with Metamorph software, when using the  
517 spinning disk confocal. Z-stacks were taken with Plan Fluor 40x NA=1.3 or Apochromat 60x  
518 NA=1.4 objectives. Excitation of GFP was achieved with 488 nm wavelength laser (2-8%  
519 intensity, 100 ms exposure time). mCherry was excited with 561 nm wavelength (15-20%  
520 intensity, 100 ms exposure time). ~0.5 μm z-steps were recorded with iXon3 EMCCD camera  
521 (Andor). Multidimensional data were reconstructed as maximum intensity projections using Fiji  
522 software (NIH ImageJ). For live imaging of worms with fused BWM phenotypes, plates with

523 worms were placed on the stage of Zeiss stereo Discovery V8 stereo microscope. Images and  
524 movies were captured at x8 magnification with additional magnification from PlanApo S 2.3X  
525 objective and a Hamamatsu ORCA-ER camera controlled by micromanager software  
526 (<https://micro-manager.org>). Figures were prepared using Fiji, Adobe Photoshop CS5 and  
527 GraphPad Prism 8.

528

### 529 **DNA transformation and viral infection by microinjection**

530 Microinjections were performed as described [7,34] with some modifications. Shortly, late L4  
531 or young adult worms were placed into droplet of halocarbon oil on 3% agarose pads. Pulled  
532 capillary needles were secured onto a Nikon DIAPHOT 300 microscope equipped with a  
533 micromanipulator and regulated pressure source (Narishige). For DNA transformation,  
534 needles were loaded with 0.8  $\mu$ l with DNA solution containing TE buffer, the target construct  
535 DNA, a co-injection marker DNA and the required amount of with pKSI-1 (empty vector) DNA  
536 to reach a total concentration of 100 ng/ $\mu$ l DNA. For experiments with viral infection, needles  
537 were loaded 0.8  $\mu$ l DMEM (mock-infections) or pseudo viruses in DMEM+5%FBS. Infection  
538 doses of VSV are based on VSV titration on BHK cells and used 10nL volume as a single  
539 microinjection dose [7]. Agar pads with worms were placed on stage of Nikon DIAPHOT 300  
540 microscope. Worms were observed under x40 objective. For DNA transformation, animals  
541 were injected into the gonad and immediately placed into droplet of M9 buffer placed on NGM  
542 plates seeded with OP50-1 *E. coli*. For experiments with viral infection worms were injected  
543 into pseudocoelom -behind the terminal bulb of the pharynx and were immediately placed into  
544 droplet of M9 buffer placed on NGM plates with 50  $\mu$ g/mL FUdR (Sigma), seeded with OP50-  
545 1 *E. coli*. Unless otherwise stated, animals were maintained at 25°C until scoring of infection.

546

### 547 **Scoring viral infection**

548 Scoring viral infection using fluorescence assay was performed as described [7,34] with some  
549 modifications. Briefly, 48-72 hours post injection worms were processed for live imaging as  
550 described above. Animals that were unresponsive to prodding by a platinum wire worm pick  
551 were considered dead and were removed from the experiment. Animals that crawled off the  
552 plate or were lost during the experiment were censored. Worms with  $\geq 1$  GFP (+) cells were  
553 considered as infected worms, while not injected or DMEM injected worms served as a  
554 negative controls. For different experiments, either the number of GFP(+) cells/animals or the  
555 type of infected tissues were observed and quantified.

### 556 **Temperature shift experiments**

557 Temperature sensitive *eff-1(hy21ts)* mutant worms were synchronized by hypochlorite  
558 treatment of adult worms. The obtained eggs were left for overnight L1 hatching on NGM  
559 plates without food at 20° C. L1 animals were then transferred to NGM plates with OP50  
560 bacteria at 15° C or 25° C incubators until reaching the desired developmental stage. The  
561 plates were either downshifted from 25° C to 15° C, or left at 25° C or at 15° C throughout the  
562 experiment. The developmental stages were determined by analyzing gonadal size and  
563 structure using Nomarski optics. Finally, worms were injected with VSV $\Delta$ G-AFF-1, maintained  
564 and imaged as described above.

565

### 566 **Counting overlapping cells**

567 To test if EFF-1 expressing BWMs were infected by VSV $\Delta$ G-AFF-1, we utilized worms with an  
568 extrachromosomal array expressing EFF-1 under the *myo-3* promoter and a plasmid  
569 containing *myo-3p::mCherry*. We found that most mCherry (+) worms had a wt-like phenotype,  
570 but a small fraction of these worms were Unc+Dpy. Importantly, all sibling mCherry(-) worms  
571 were wt-like (Table S1). Hence, for the experiment we utilized a fluorescence  
572 stereomicroscope and chose late L4/ young adult, wt-like and Unc+Dpy animals that had  
573 continuous *myo-3p::mCherry*(+) BWMs (which could express EFF-1 and fuse with each other).  
574 Next, these worms were injected with VSV $\Delta$ G-AFF-1 or VSV $\Delta$ G-G. 48-72h later, Z-stack  
575 images of the worms were obtained with SDC microscope (as described in live imaging  
576 section). Worms with  $\geq 1$  infected BWM were selected. For each worm, we counted the number  
577 of BWMs that were mCherry(+) only (express EFF-1), GFP(+) only (infected by virus) and  
578 overlapping- with both mCherry(+) and GFP(+) (express EFF-1 and infected).

579

### 580 **Counting number of nuclei per BWM**

581 To test if ectopic EFF-1 expression in BWMs produces multinucleated BWMs, wt-like and  
582 Unc+Dpy animals that had continuous *myo-3p::mCherry*(+) BWMs (which could express EFF-  
583 1 and fuse with each other) were imaged by SDC microscope as described above. In one set  
584 of experiments we imaged L2 worms and counted number of nuclei per *myo-3p::mCherry* cell.  
585 In a second set of experiments, we imaged adult worms with BWMs infected by either VSV $\Delta$ G-  
586 AFF-1 or VSV $\Delta$ G-G and counted number of nuclei per infected (GFP(+)) BWM cell. For both  
587 sets of experiments, in worms with at least one multinucleated BWM we monitored all  
588 multinucleated BWMs and calculated the average number of nuclei/BWM for each worm.  
589 Worms in which multinucleated cells were not observed, were considered as having 1  
590 nucleus/BWM.

591

### 592 **Counting phenotypes in worms expressing EFF-1 in BWMs**

593 To find whether ectopic expression of EFF-1 in BWM cells produces any special phenotypes,  
594 we used BP2137 *drh-1(tm1329)IV*; *hyEx375[myo-3p::EFF-1, myo-3p::mCherry, KS*  
595 *bluescript]*. We first isolated 4 wt-like *myo-3p::mCherry* L4 hermaphrodite worms, one worm  
596 per NGM plate+Op50. These worms were led to lay eggs and were transferred to a fresh  
597 plate 1-2 times per day during 5 days. Progeny including eggs, larvae and adults were divided  
598 into two groups, namely *myo-3p::mCherry(+)* and *myo-3p::mCherry(-)*. We counted the total  
599 number of progeny with a certain phenotype (e.g. wt-like worms, adult Unc+Dpy worms, larval  
600 arrested Unc+Dpy worms and unhatched eggs) for each of the 4 mothers. Finally, we  
601 calculated the average number of worms with certain phenotype  $\pm$  SEM and the fraction  $\pm$  SE  
602 of worms with a certain phenotype in each group.

603

#### 604 **Cell culture and preparation of pseudoviruses**

605 Baby Hamster Kidney cells (BHK), BHK-21(ATCC) were cultured in Dulbecco's Modified  
606 Eagles Medium (DMEM) and recombinant viruses were prepared as described [6] with some  
607 modifications. Briefly, BHK cells were grown to 70% confluence on 10 cm plates and then  
608 transfected using Fugene HD + OptiMEM at ratio 1:4 (Fugene:DNA), with plasmids encoding  
609 pOA20 (pCAGGS::*aff-1::FLAG*, 2 $\mu$ g/ml final concentration) [6] or pOA28 (pCAGGS::*VSV-G*  
610 *Indiana*, 1 $\mu$ g/ml final concentration)[33]. Following 24 h incubation at 37°C in 5% CO<sub>2</sub>, cells  
611 were infected with VSVG-complemented VSV $\Delta$ G recombinant virus (VSV $\Delta$ G-G) at a  
612 multiplicity of infection (MOI) of 5, for 1 hour at 37°C in a 5% CO<sub>2</sub> incubator in serum free  
613 DMEM. Virus infected cells were washed 3-6 times with PBS (+ Ca<sup>++</sup> & Mg<sup>++</sup>) to remove  
614 unabsorbed VSV $\Delta$ G-G virus. Following a 24 h incubation period at 37°C, the supernatant  
615 containing the VSV $\Delta$ G-G, or VSV $\Delta$ G-AFF-1 pseudoviruses were harvested without scraping  
616 the cells and centrifuged at 600 g for 10 min at 4°C to clear cell debris. VSV $\Delta$ G-AFF-1 Virions  
617 were filtered through 0.22  $\mu$ m filter unit and then double concentrated. First, by pelleting at  
618 100,000 g through a 20% sucrose cushion, and resuspension in 10%FBS DMEM, second, by  
619 pelleting at 100,000 g through a 10% sucrose cushion, and final resuspension in 45 $\mu$ l DMEM.  
620 Finally, VSV $\Delta$ G-AFF-1 was incubated with anti-VSV-G antibody mAb diluted 1:1000 to inhibit  
621 infection due to residual presence of VSV-G. The effective blocking of VSV-G was confirmed  
622 by titrating pseudoviruses in BHK cells and by injection of VSV $\Delta$ G-G incubated with anti-VSV-  
623 G into worms (Figure S4).

624

#### 625 **Titering VSV pseudotyped viruses**

626 Titering VSV pseudotyped viruses was performed as described [6] with some modifications.  
627 Briefly, 5x10<sup>3</sup> BHK cells were plated into each well of a 96 well tissue culture plate (NUNC,  
628 cat# 167008). To determine the titer of VSV $\Delta$ G-AFF-1, BHK cells were initially transfected with

629 2 µg/ml pOA20 (pCAGGS::AFF-1::FLAG). Cells transfected with empty vector served as  
630 control. Eight serial x2 dilutions of the virus were performed and added to cells. After 18-24  
631 hours of incubation, GFP expressing cells were counted in at least three dilutions using x20  
632 objective of Zeiss Axiovert 200M fluorescence microscope. Inoculation was performed in the  
633 presence of anti-VSV-G antibody mAb diluted 1:1000 to inhibit infection due to residual  
634 presence of VSV-G.

635

### 636 **Statistical tests**

637 The specific tests used are described in the figure captions and the results section. The graphs  
638 show mean ± SEM unless noted otherwise. For each experiment at least two biological  
639 replicates were performed and the number of animals per experiment is stated in the figure  
640 legends.

641



## 642 References

- 643 1. Lichty, B.D., Power, A.T., Stojdl, D.F., and Bell, J.C. (2004). Vesicular stomatitis virus:  
644 Re-inventing the bullet. *Trends Mol. Med.* *10*, 210–216.
- 645 2. van den Pol, A.N., Ozduman, K., Wollmann, G., Ho, W.S.C., Simon, I., Yao, Y., Rose,  
646 J.K., and Ghosh, P. (2009). Viral strategies for studying the brain, including a  
647 replication-restricted self-amplifying delta-G vesicular stomatitis virus that rapidly  
648 expresses transgenes in brain and can generate a multicolor Golgi-like expression. *J.*  
649 *Comp. Neurol.* *516*, 456–481.
- 650 3. Hastie, E., Cataldi, M., Marriott, I., and Grdzelishvili, V.Z. (2013). Understanding and  
651 altering cell tropism of vesicular stomatitis virus. *Virus Res.* *176*, 16–32.
- 652 4. Hoffmann, M., Kleine-Weber, H., Schroeder, S., Krüger, N., Herrler, T., Erichsen, S.,  
653 Schiergens, T.S., Herrler, G., Wu, N.-H., Nitsche, A., *et al.* (2020). SARS-CoV-2 Cell  
654 Entry Depends on ACE2 and TMPRSS2 and Is Blocked by a Clinically Proven Protease  
655 Inhibitor. *Cell* *181*, 271–280.
- 656 5. Halperin, S.A., Das, R., Onorato, M.T., Liu, K., Martin, J., Grant-Klein, R.J., Nichols, R.,  
657 Collier, B.-A., Helmond, F.A., and Simon, J.K. (2019). Immunogenicity, Lot Consistency,  
658 and Extended Safety of rVSVΔG-ZEBOV-GP Vaccine: A Phase 3 Randomized,  
659 Double-Blind, Placebo-Controlled Study in Healthy Adults. *J. Infect. Dis.* *220*, 1127–  
660 1135.
- 661 6. Avinoam, O., Fridman, K., Valansi, C., Abutbul, I., Zeev-Ben-Mordehai, T., Maurer,  
662 U.E., Sapir, A., Danino, D., Grünewald, K., White, J.M., *et al.* (2011). Conserved  
663 eukaryotic fusogens can fuse viral envelopes to cells. *Science.* *332*, 589–592.
- 664 7. Gammon, D.B., Ishidate, T., Li, L., Gu, W., Silverman, N., and Mello, C.C. (2017). The  
665 Antiviral RNA Interference Response Provides Resistance to Lethal Arbovirus Infection  
666 and Vertical Transmission in *Caenorhabditis elegans*. *Curr. Biol.* *27*, 795–806.
- 667 8. Presley, J.F., Smith, C., Hirschberg, K., Miller, C., Cole, N.B., Zaal, K.J.M., and  
668 Lippincott-Schwartz, J. (1998). Golgi membrane dynamics. *Mol. Biol. Cell* *9*, 1617–  
669 1626.
- 670 9. Ogino, T., and Green, T.J. (2019). RNA Synthesis and Capping by Non-segmented  
671 Negative Strand RNA Viral Polymerases: Lessons From a Prototypic Virus. *Front.*  
672 *Microbiol.* *10*, 1490.
- 673 10. Finkelshtein, D., Werman, A., Novick, D., Barak, S., and Rubinstein, M. (2013). LDL  
674 receptor and its family members serve as the cellular receptors for vesicular stomatitis  
675 virus. *Proc. Natl. Acad. Sci. U. S. A.* *110*, 7306–7311.
- 676 11. Bergman, I., Whitaker-Dowling, P., Gao, Y., Griffin, J.A., and Watkins, S.C. (2003).  
677 Vesicular stomatitis virus expressing a chimeric Sindbis glycoprotein containing an Fc  
678 antibody binding domain targets to Her2/neu overexpressing breast cancer cells.  
679 *Virology* *316*, 337–347.
- 680 12. Schnell, M.J., Johnson, J.E., Buonocore, L., and Rose, J.K. (1997). Construction of a  
681 novel virus that targets HIV-1-infected cells and controls HIV-1 infection. *Cell* *90*, 849–  
682 857.
- 683 13. Gao, Y., Whitaker-Dowling, P., Griffin, J.A., Barmada, M.A., and Bergman, I. (2009).  
684 Recombinant vesicular stomatitis virus targeted to Her2/neu combined with anti-CTLA4  
685 antibody eliminates implanted mammary tumors. *Cancer Gene Ther.* *16*, 44–52.
- 686 14. Mohler, W.A., Shemer, G., Del Campo, J.J., Valansi, C., Opoku-Serebuoh, E.,  
687 Scranton, V., Assaf, N., White, J.G., and Podbilewicz, B. (2002). The type 1 membrane  
688 protein EFF-1 is essential for development cell fusion. *Dev. Cell* *2*, 355–362.
- 689 15. Shemer, G., and Podbilewicz, B. (2002). LIN-39/Hox triggers cell division and  
690 represses EFF-1/fusogen-dependent vulval cell fusion. *Genes Dev.*
- 691 16. Podbilewicz, B. (2006). Cell fusion. *WormBook* *93*, 71–79.
- 692 17. Rasmussen, J.P., English, K., Tenlen, J.R., and Priess, J.R. (2008). Notch Signaling  
693 and Morphogenesis of Single-Cell Tubes in the *C. elegans* Digestive Tract. *Dev. Cell*  
694 *14*, 559–569.

- 695 18. Sapir, A., Choi, J., Leikina, E., Avinoam, O., Valansi, C., Chernomordik, L. V., Newman,  
696 A.P., and Podbilewicz, B. (2007). AFF-1, a FOS-1-Regulated Fusogen, Mediates  
697 Fusion of the Anchor Cell in *C. elegans*. *Dev. Cell* 12, 683–698.
- 698 19. Shemer, G., Suissa, M., Kolotuev, I., Nguyen, K.C.Q., Hall, D.H., and Podbilewicz, B.  
699 (2004). EFF-1 is sufficient to initiate and execute tissue-specific cell fusion in *C.*  
700 *elegans*. *Curr. Biol.* 14, 1587–1591.
- 701 20. Abdus-Saboor, I., Mancuso, V.P., Murray, J.I., Palozola, K., Norris, C., Hall, D.H.,  
702 Howell, K., Huang, K., and Sundaram, M. V. (2011). Notch and Ras promote sequential  
703 steps of excretory tube development in *C. elegans*. *Development* 138, 3545–3555.
- 704 21. Soulavie, F., Hall, D.H., and Sundaram, M. V. (2018). The AFF-1 exoplasmic fusogen  
705 is required for endocytic scission and seamless tube elongation. *Nat. Commun.* 9,  
706 1741.
- 707 22. Stone, C.E., Hall, D.H., and Sundaram, M. V. (2009). Lipocalin signaling controls  
708 unicellular tube development in the *Caenorhabditis elegans* excretory system. *Dev.*  
709 *Biol.* 329, 201–211.
- 710 23. Ghosh-Roy, A., Wu, Z., Goncharov, A., Jin, Y., and Chisholm, A.D. (2010). Calcium  
711 and cyclic AMP promote axonal regeneration in *Caenorhabditis elegans* and require  
712 DLK-1 kinase. *J. Neurosci.* 30, 3175–3183.
- 713 24. Neumann, B., Coakley, S., Giordano-Santini, R., Linton, C., Lee, E.S. eun., Nakagawa,  
714 A., Xue, D., and Hilliard, M.A. (2015). EFF-1-mediated regenerative axonal fusion  
715 requires components of the apoptotic pathway. *Nature* 517, 219–222.
- 716 25. Oren-Suissa, M., Hall, D.H., Treinin, M., Shemer, G., and Podbilewicz, B. (2010). The  
717 fusogen EFF-1 controls sculpting of mechanosensory dendrites. *Science.* 328, 1285–  
718 1288.
- 719 26. Oren-Suissa, M., Gattegno, T., Kravtsov, V., and Podbilewicz, B. (2017). Extrinsic  
720 repair of injured dendrites as a paradigm for regeneration by fusion in *Caenorhabditis*  
721 *elegans*. *Genetics* 206, 215–230.
- 722 27. Kravtsov, V., Oren-Suissa, M., and Podbilewicz, B. (2017). The fusogen AFF-1 can  
723 rejuvenate the regenerative potential of adult dendritic trees by self-fusion. *Dev.* 144,  
724 2364–2374.
- 725 28. Harrison, S.C. (2015). Viral membrane fusion. *Virology* 479–480, 498–507.
- 726 29. Podbilewicz, B. (2014). Virus and Cell Fusion Mechanisms. *Annu. Rev. Cell Dev. Biol.*  
727 30, 111–139.
- 728 30. Pérez-Vargas, J., Krey, T., Valansi, C., Avinoam, O., Haouz, A., Jamin, M., Raveh-  
729 Barak, H., Podbilewicz, B., and Rey, F.A. (2014). Structural basis of eukaryotic cell-cell  
730 fusion. *Cell* 157, 407–419.
- 731 31. White, J.M. (2007). The First Family of Cell-Cell Fusion. *Dev. Cell* 12, 683–698.
- 732 32. Robison, C.S., and Whitt, M.A. (2000). The Membrane-Proximal Stem Region of  
733 Vesicular Stomatitis Virus G Protein Confers Efficient Virus Assembly. *J. Virol.* 74,  
734 2239–2246.
- 735 33. Whitt, M.A. (2010). Generation of VSV pseudotypes using recombinant  $\Delta$ G-VSV for  
736 studies on virus entry, identification of entry inhibitors, and immune responses to  
737 vaccines. *J. Virol. Methods* 169, 365–374.
- 738 34. Martin, A., Rex, E., Ishidate, T., Lin, R., and Gammon, D. (2017). Infection of  
739 *Caenorhabditis elegans* with Vesicular Stomatitis Virus via Microinjection. *BIO-*  
740 *PROTOCOL* 7, e2617.
- 741 35. Quiroz, E., Moreno, N., Peralta, P.H., and Tesh, R.B. (1988). A human case of  
742 encephalitis associated with vesicular stomatitis virus (Indiana serotype) infection. *Am.*  
743 *J. Trop. Med. Hyg.* 39, 312–314.
- 744 36. Guerra-Varela, J., Baz-Martínez, M., Da Silva-Álvarez, S., Losada, A.P., Quiroga, M.I.,  
745 Collado, M., Rivas, C., and Sánchez, L. (2018). Susceptibility of Zebrafish to Vesicular  
746 Stomatitis Virus Infection. *Zebrafish* 15, 124–132.
- 747 37. Barrera, J.D.C., and Letchworth, G.J. (1996). Persistence of Vesicular Stomatitis Virus

- 748 New Jersey RNA in Convalescent Hamsters. *Virology* 219, 453–464.
- 749 38. Valansi, C., Moi, D., Leikina, E., Matveev, E., Graña, M., Chernomordik, L. V., Romero,  
750 H., Aguilar, P.S., and Podbilewicz, B. (2017). Arabidopsis HAP2/GCS1 is a gamete  
751 fusion protein homologous to somatic and viral fusogens. *J. Cell Biol.* 216, 571–581.
- 752 39. Yochem, J., Gu, T., and Han, M. (1998). A new marker for mosaic analysis in  
753 *Caenorhabditis elegans* indicates a fusion between hyp6 and hyp7, two major  
754 components of the hypodermis. *Genetics* 149, 1323–1334.
- 755 40. Podbilewicz, B., and White, J.G. (1994). Cell fusions in the developing epithelia of *C.*  
756 *elegans*. *Dev. Biol.* 161, 408–424.
- 757 41. Fukushige, T., Brodigan, T.M., Schriefer, L.A., Waterston, R.H., and Krause, M. (2006).  
758 Defining the transcriptional redundancy of early bodywall muscle development in *C.*  
759 *elegans*: Evidence for a unified theory of animal muscle development. *Genes Dev.* 20,  
760 3395–3406.
- 761 42. Kim, J., Löwe, T., and Hoppe, T. (2008). Protein quality control gets muscle into shape.  
762 *Trends Cell Biol.* 18, 264–272.
- 763 43. Frumkin, A., Dror, S., Pokrzywa, W., Bar-Lavan, Y., Karady, I., Hoppe, T., and Ben-Zvi,  
764 A. (2014). Challenging muscle homeostasis uncovers novel chaperone interactions in  
765 *Caenorhabditis elegans*. *Front. Mol. Biosci.* 6, 21.
- 766 44. Dreier, B., Honegger, A., Hess, C., Nagy-Davidescu, G., Mittl, P.R.E., Grütter, M.G.,  
767 Belousova, N., Mikheeva, G., Krasnykh, V., and Plückthun, A. (2013). Development of  
768 a generic adenovirus delivery system based on structure-guided design of bispecific  
769 trimeric DARPIn adapters. *Proc. Natl. Acad. Sci. U. S. A.* 5, E869–E877.
- 770 45. Raposo, G., and Stoorvogel, W. (2013). Extracellular vesicles: Exosomes,  
771 microvesicles, and friends. *J. Cell Biol.* 200, 373–383.
- 772 46. Sdrimas, K., and Kourembanas, S. (2014). MSC microvesicles for the treatment of lung  
773 disease: A new paradigm for cell-free therapy. *Antioxidants Redox Signal.* 21, 1905–  
774 1915.
- 775 47. Segev, N., Avinoam, O., and Podbilewicz, B. (2018). Fusogens. *Curr. Biol.* 28, R378-  
776 R380.
- 777 48. Brukman, N.G., Uygur, B., Podbilewicz, B., and Chernomordik, L. V. (2019). How cells  
778 fuse. *J. Cell Biol.* 218, 1436–1451.
- 779 49. Blond, J.-L., Lavillette, D., Cheynet, V., Bouton, O., Oriol, G., Chapel-Fernandes, S.,  
780 Mandrand, B., Mallet, F., and Cosset, F.-L. (2000). An Envelope Glycoprotein of the  
781 Human Endogenous Retrovirus HERV-W Is Expressed in the Human Placenta and  
782 Fuses Cells Expressing the Type D Mammalian Retrovirus Receptor. *J. Virol.* 74,  
783 3321–3329.
- 784 50. Sha, M., Lee, X., Li, X. ping, Veldman, G.M., Finnerty, H., Racie, L., LaVallie, E., Tang,  
785 X.Y., Edouard, P., Howes, S., *et al.* (2000). Syncytin is a captive retroviral envelope  
786 protein involved in human placental morphogenesis. *Nature* 403, 785–789.
- 787 51. Kokkinos, M.I., Murthi, P., Wafai, R., Thompson, E.W., and Newgreen, D.F. (2010).  
788 Cadherins in the human placenta - Epithelial-mesenchymal transition (EMT) and  
789 placental development. *Placenta* 31, 747–755.
- 790 52. von Besser, K., Frank, A.C., Johnson, M.A., and Preuss, D. (2006). Arabidopsis HAP2  
791 (GCS1) is a sperm-specific gene required for pollen tube guidance and fertilization.  
792 *Development* 133, 4761–4769.
- 793 53. Liu, C., Zhou, Y., Zhang, X., Zhang, J., Zhou, Z., Weng, J., Li, X., and Wang, Z. (2019).  
794 Natural variation in the THICK TASSEL DWARF1 (TD1) gene in the regulation of maize  
795 (*Zea mays* L.) ear-related traits. *Breed. Sci.* 69, 323–331.
- 796 54. Cole, E.S., Cassidy-Hanley, D., Fricke Pinello, J., Zeng, H., Hsueh, M., Kolbin, D.,  
797 Ozzello, C., Giddings, T., Winey, M., and Clark, T.G. (2014). Function of the male-  
798 gamete-specific fusion protein HAP2 in a seven-sexed ciliate. *Curr. Biol.* 24, 2168–  
799 2173.
- 800 55. Millay, D.P., O'Rourke, J.R., Sutherland, L.B., Bezprozvannaya, S., Shelton, J.M.,

- 801 Bassel-Duby, R., and Olson, E.N. (2013). Myomaker is a membrane activator of  
802 myoblast fusion and muscle formation. *Nature* 499, 301–305.
- 803 56. Gamage, D.G., Leikina, E., Quinn, M.E., Ratinov, A., Chernomordik, L. V., and Millay,  
804 D.P. (2017). Insights into the localization and function of myomaker during myoblast  
805 fusion. *J. Biol. Chem.* 292, 17272–17289.
- 806 57. Mitani, Y., Vagnozzi, R.J., and Millay, D.P. (2017). In vivo myomaker-mediated  
807 heterologous fusion and nuclear reprogramming. *FASEB J.* 31, 400–411.
- 808 58. Bi, P., Ramirez-Martinez, A., Li, H., Cannavino, J., McAnally, J.R., Shelton, J.M.,  
809 Sánchez-Ortiz, E., Bassel-Duby, R., and Olson, E.N. (2017). Control of muscle  
810 formation by the fusogenic micropeptide myomixer. *Science* (80-. ). 356, 323–327.
- 811 59. Zhu, T., Liang, X., Wang, X.M., and Shen, K. (2017). Dynein and EFF-1 control dendrite  
812 morphology by regulating the localization pattern of SAX-7 in epidermal cells. *J. Cell*  
813 *Sci.* 130, 4063–4071.
- 814 60. Buechner, M., Hall, D.H., Bhatt, H., and Hedgecock, E.M. (1999). Cystic canal mutants  
815 in *Caenorhabditis elegans* are defective in the apical membrane domain of the renal  
816 (excretory) cell. *Dev. Biol.* 214, 227–241.
- 817 61. Nelson, F.K., and Riddle, D.L. (1984). Functional study of the *Caenorhabditis elegans*  
818 secretory-excretory system using laser microsurgery. *J. Exp. Zool.* 231, 45–56.
- 819 62. Gunage, R.D., Dhanyasi, N., Reichert, H., and VijayRaghavan, K. (2017). *Drosophila*  
820 adult muscle development and regeneration. *Semin. Cell Dev. Biol.* 72, 56–66.
- 821 63. Sampath, S.C., Sampath, S.C., and Millay, D.P. (2018). Myoblast fusion confusion: The  
822 resolution begins. *Skelet. Muscle* 8, 3.
- 823 64. Gjorgjieva, J., Biron, D., and Haspel, G. (2014). Neurobiology of *caenorhabditis*  
824 *elegans* locomotion: Where do we stand? *Bioscience*, 476–486.
- 825 65. Brenner, S. (1974). The genetics of *Caenorhabditis elegans*. *Genetics* 77, 71–94.
- 826 66. Sulston, J., and Hodgkin, J. (1988). Methods in the nematode *C. elegans*. In Cold  
827 Spring Harbor Laboratory Press, pp. 587–606.
- 828 67. Mello, C., and Fire, A. (1995). DNA Transformation. *Methods Cell Biol.* 8, 2159–2165.
- 829 68. Takada, A., Robison, C., Goto, H., Sanchez, A., Murti, K.G., Whitt, M.A., and Kawaoka,  
830 Y. (1997). A system for functional analysis of Ebola virus glycoprotein. *Proc Natl Acad*  
831 *Sci U S A* 94, 14764-14769.
- 832 69. Stoker, M., and Macpherson, I. (1964). Syrian Hamster Fibroblast Cell Line Bhk21 and  
833 Its Derivatives. *Nature* 203, 1355-1357.
- 834 70. Diaz-Balzac, C.A., Rahman, M., Lazaro-Pena, M.I., Martin Hernandez, L.A., Salzberg,  
835 Y., Aguirre-Chen, C., Kaprielian, Z., and Bulow, H.E. (2016). Muscle- and Skin-Derived  
836 Cues Jointly Orchestrate Patterning of Somatosensory Dendrites. *Curr Biol* 26, 2397.
- 837 71. Yang, J., Sun, B., Huang, H., Jiang, Y., Diao, L., Chen, B., Xu, C., Wang, X., Liu, J.,  
838 Jiang, W., et al. (2014). High-efficiency scarless genetic modification in *Escherichia coli*  
839 by using lambda red recombination and I-SceI cleavage. *Appl Environ Microbiol* 80,  
840 3826-3834.
- 841 72. Frokjaer-Jensen, C., Davis, M.W., Hopkins, C.E., Newman, B.J., Thummel, J.M.,  
842 Olesen, S.P., Grunnet, M., and Jorgensen, E.M. (2008). Single-copy insertion of  
843 transgenes in *Caenorhabditis elegans*. *Nat Genet* 40, 1375-1383.
- 844 73. Dickinson, D.J., Ward, J.D., Reiner, D.J., and Goldstein, B. (2013). Engineering the  
845 *Caenorhabditis elegans* genome using Cas9-triggered homologous recombination. *Nat*  
846 *Methods* 10, 1028-1034.
- 847 74. Ward, J.D. (2015). Rapid and precise engineering of the *Caenorhabditis elegans*  
848 genome with lethal mutation co-conversion and inactivation of NHEJ repair. *Genetics*  
849 199, 363-377.
- 850 75. Edelstein, A., Amodaj, N., Hoover, K., Vale, R., and Stuurman, N. (2010). Computer  
851 control of microscopes using microManager. *Curr Protoc Mol Biol Chapter 14*, Unit14  
852 20.  
853

854 **Abbreviations**

|     |             |                                                                            |
|-----|-------------|----------------------------------------------------------------------------|
| 855 | AFF-1       | Anchor cell Fusion Failure                                                 |
| 856 | BHK         | Baby Hamster Kidney cells                                                  |
| 857 | BWM         | Body Wall Muscle                                                           |
| 858 | Dpy         | Dumpy phenotype                                                            |
| 859 | EC          | Excretory Canal cell                                                       |
| 860 | EFF-1       | Epithelial Fusion Failure 1                                                |
| 861 | EFF-2       | Epithelial Fusion Failure 2                                                |
| 862 | FUSEXINS    | FUSion proteins essential for sexual reproduction and Exoplasmic merger of |
| 863 |             | plasma membranes                                                           |
| 864 | HYP         | Hypodermis (epidermis)                                                     |
| 865 | SM          | Somatointestinal Muscle                                                    |
| 866 | ts          | temperature sensitive                                                      |
| 867 | UM          | Uterine Muscle                                                             |
| 868 | Unc         | Uncoordinated phenotype                                                    |
| 869 | VSV         | Vesicular Stomatitis Virus                                                 |
| 870 | VSV-G       | VSV-glycoprotein G                                                         |
| 871 | VSVΔG       | pseudoviruses in which the glycoprotein G gene was deleted                 |
| 872 | VSVΔG-AFF-1 | pseudovirus coated with AFF-1                                              |
| 873 | VSVΔG-G     | pseudovirus coated with G glycoprotein                                     |

874

875 **Acknowledgements**

876 We thank Don Gammon for providing the *drh-1(-)* worms, Massimo Hilliard for providing *mec-*  
877 *4p::mCherry*, *mec-4p::EFF-1*, *odr-1p::dsRed* and *odr-1p::EFF-1* plasmids and the  
878 Caenorhabditis Genetics Center for nematode strains. We thank Andy Fire for suggesting  
879 studying syncytial BWMs and their potential phenotypes. We also thank Sharon Inberg, Yael  
880 Iosilevskii, Rosina Giordano-Santini, Dan Cassel and Sivan Korenblit for helpful discussions  
881 and for critically reading the manuscript.

882

883 **Author contributions**

884 A.M. and B.P. conceived the project. A.M. performed all experiments unless otherwise  
885 specified. X.L. generated *myo-3p::EFF-1* Plasmid and BP2171-3 nematode strains and  
886 performed imaging of worms in Figure 5. E.M. improved viral preparation protocol. B.G.  
887 generated EFF-2 CRISPR plasmid and O.K. produced *eff-2(hy51)* worms. A.M. and B.P.  
888 analyzed data and wrote the manuscript, with input from all authors.

889

890 Online supplemental material

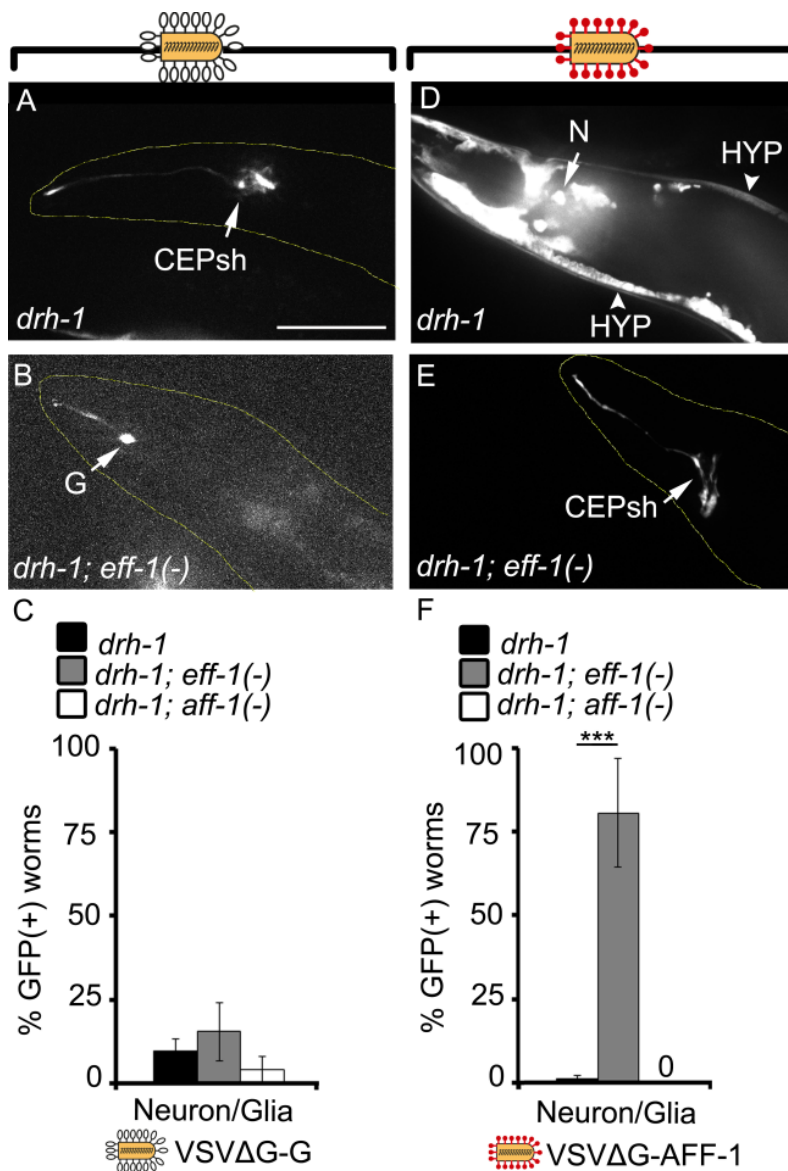

891

892

893 **Figure S1: VSVΔG-AFF-1 and VSVΔG-G infect glia and neuron cells**

894 **(A-B)** SDC microscope Z-stack projections of *drh-1* and *drh-1; eff-1(-)* worms injected in the  
 895 pseudocoelom with 2300-4700 IU VSVΔG-G (white pins) and their heads imaged 48 h later.

896 **(C)** Fraction of GFP(+) worms infected with VSVΔG-G in neuron/glia cells in the specified  
 897 background. Animals were injected with VSVΔG-G and analyzed as in (A-B).

898 **(D-E)** SDC microscope Z-stack projections of *C. elegans* cells infected with 33-240 IU VSVΔG-  
 899 AFF-1 (red pins). *drh-1* or *drh-1; eff-1(-)* worms were injected in the pseudocoelom and  
 900 imaged 48 h later.

901 **(F)** Fraction of GFP(+) worms infected with VSVΔG-AFF-1 in neuron/glia cells. Animals were  
 902 analyzed as in (D-E). For (A-B) and (D-E) arrowheads point to hypodermal nuclei (HYP) and  
 903 arrows point to indicated infected cell. CEPsh- Cephalic Sheath (glia), G- glia, N- neuron.  
 904 Scale bar, 50 μm. In (A, B and E) yellow dashed lines outline worm's anterior body (head). In  
 905 (C) and (F), bars represent average ± SEM. \*\*\*P<0.001 (Student's T- test). For VSVΔG-AFF-  
 906 1: n=46,15 and 10 for *drh-1*,*drh-1;eff-1(-)* and *drh-1;aff-1(-)* respectively, and for VSVΔG-G:  
 907 n= 56, 39 and 15 for *drh-1*, *drh-1;eff-1(-)* and *drh-1;aff-1(-)* respectively).

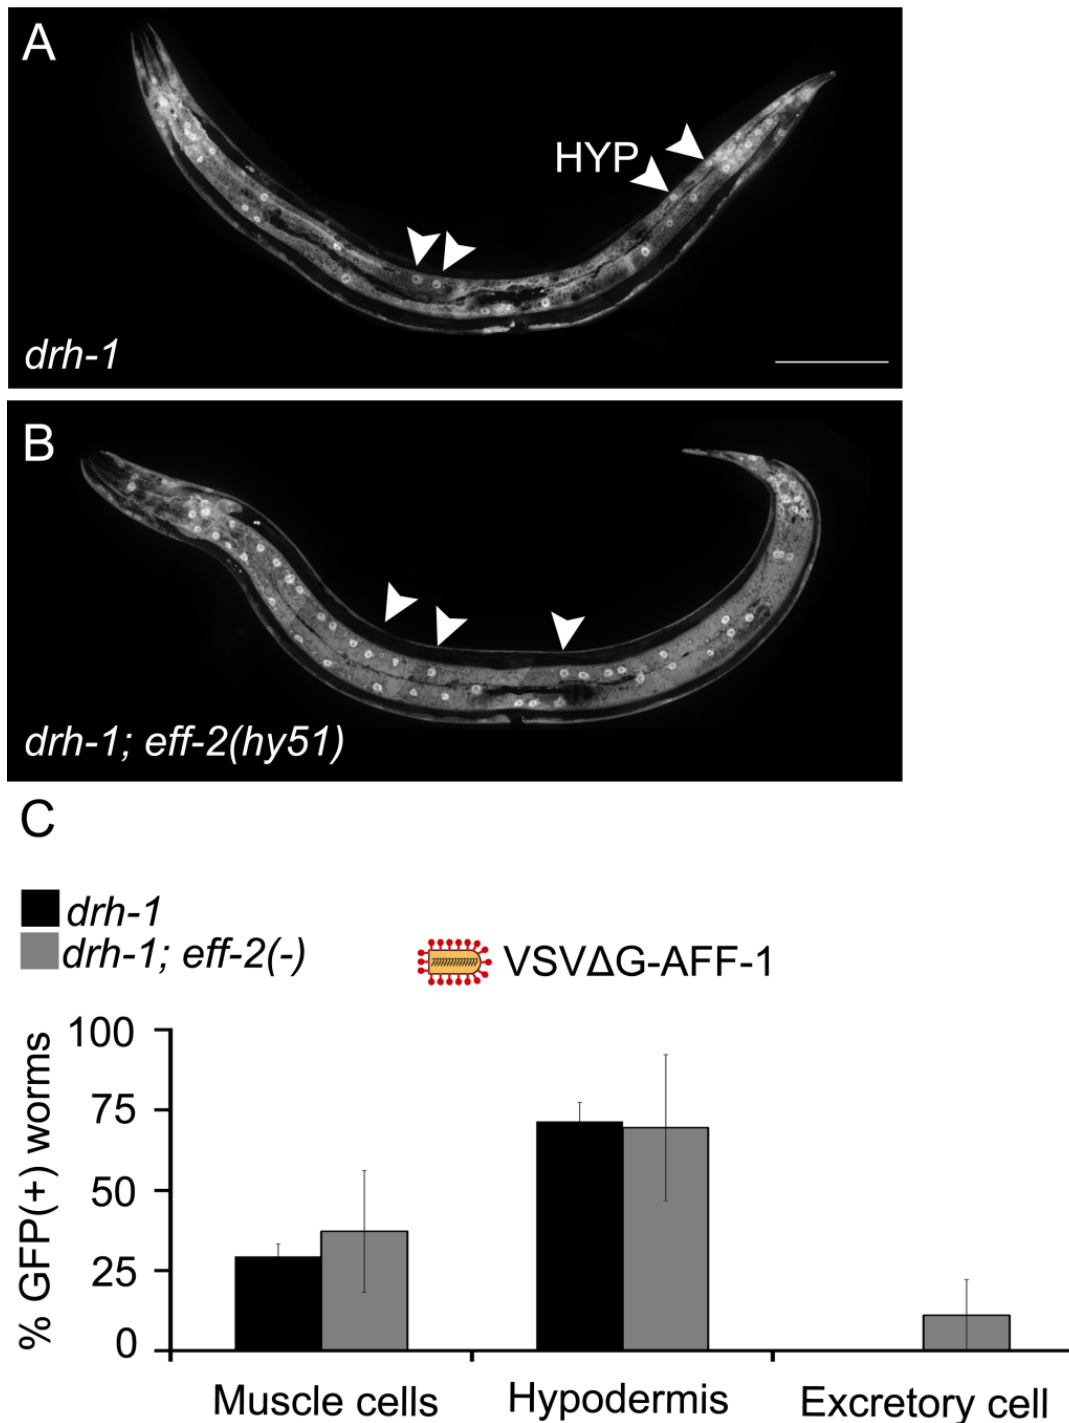

908

909

910 **Figure S2: VSVΔG-AFF-1 infects *eff-2(-)* worms**

911

912 **(A-B)** SDC microscope Z-stack projections of *drh-1* or *drh-1;eff-2(-)* worms injected with  
913 VSVΔG-AFF-1 (35-67 IU) and imaged 48 h later.

914 **(C)** Fraction of GFP(+) worms infected with VSVΔG-AFF-1. Animals were injected with  
915 VSVΔG-AFF-1 and analyzed as in (A-B). Arrowheads point to hypodermal (HYP) nuclei. Scale  
916 bar, 100 μm. In (C) bars represent average ± SEM. n=23 and 20 for *drh-1* and *drh-1;eff-2(-)*  
917 respectively. For all types of infected cells, there is no significant difference between % GFP(+)  
918 worms from *drh-1* and *drh-1;eff-2 (-)* backgrounds with two-tailed Student's t-test (p<0.05).  
919

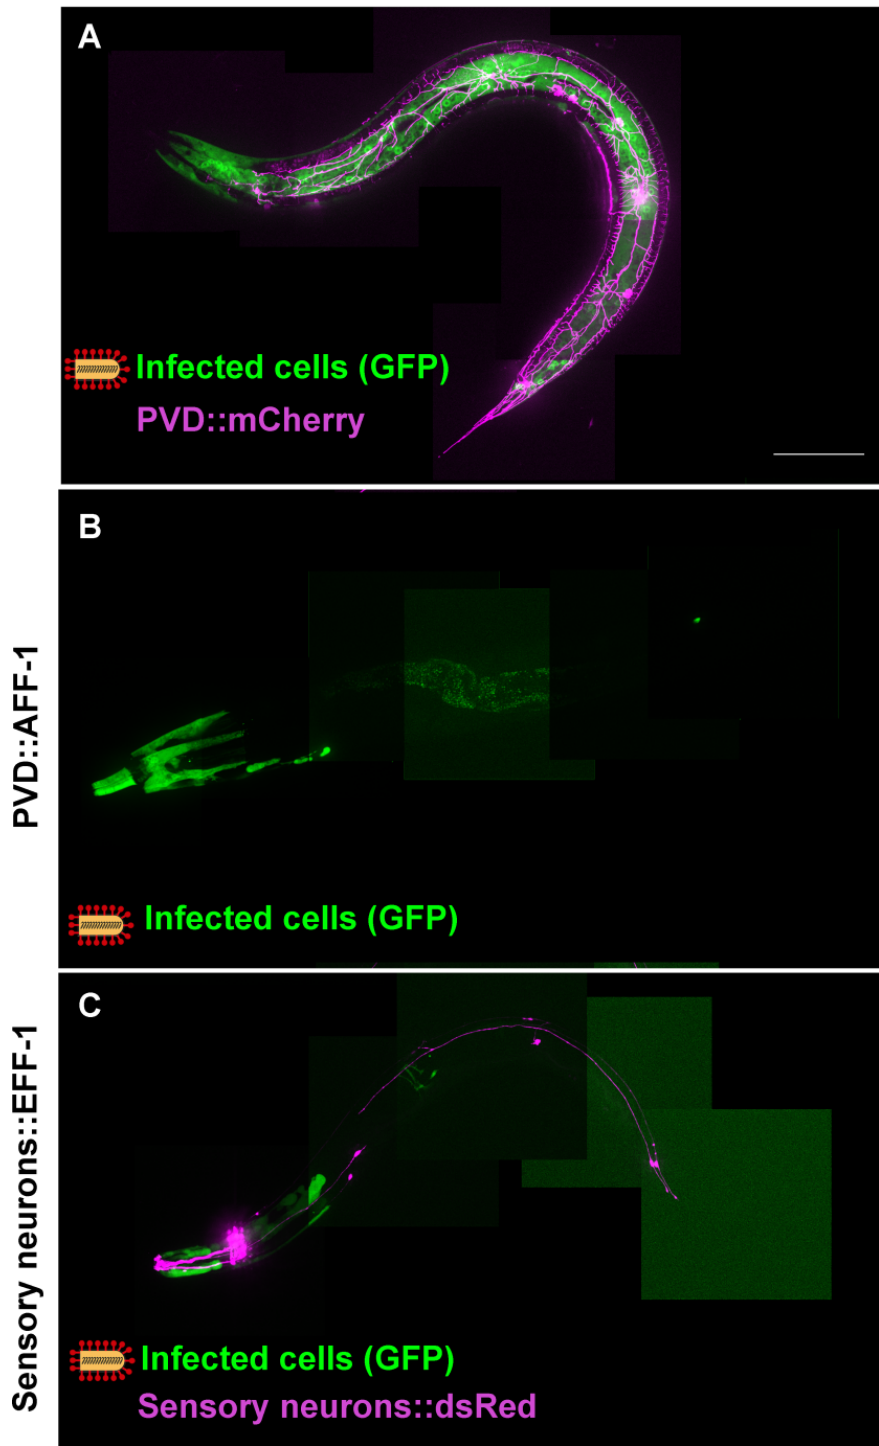

920

921 **Figure S3. VSV $\Delta$ G-AFF-1 does not infect PVD and other sensory neurons ectopically**  
922 **expressing AFF-1/EFF-1**

923 (A-C) SDC microscope Z-stack projections of animals infected with 82-103 IU VSV $\Delta$ G-AFF-1  
924 (red pins). (For genotypes and quantitation see Table S2). Scale bar, 100  $\mu$ m.

925 (A) Young adult expressing mCherry in PVD.

926 (B) *eff-1(ts)* adult expressing AFF-1 in PVD.

927 (C) *eff-1(ts)* adult expressing EFF-1 and dsRed in 12 sensory neurons.

928 See also Table S2 and Movie S2.



929

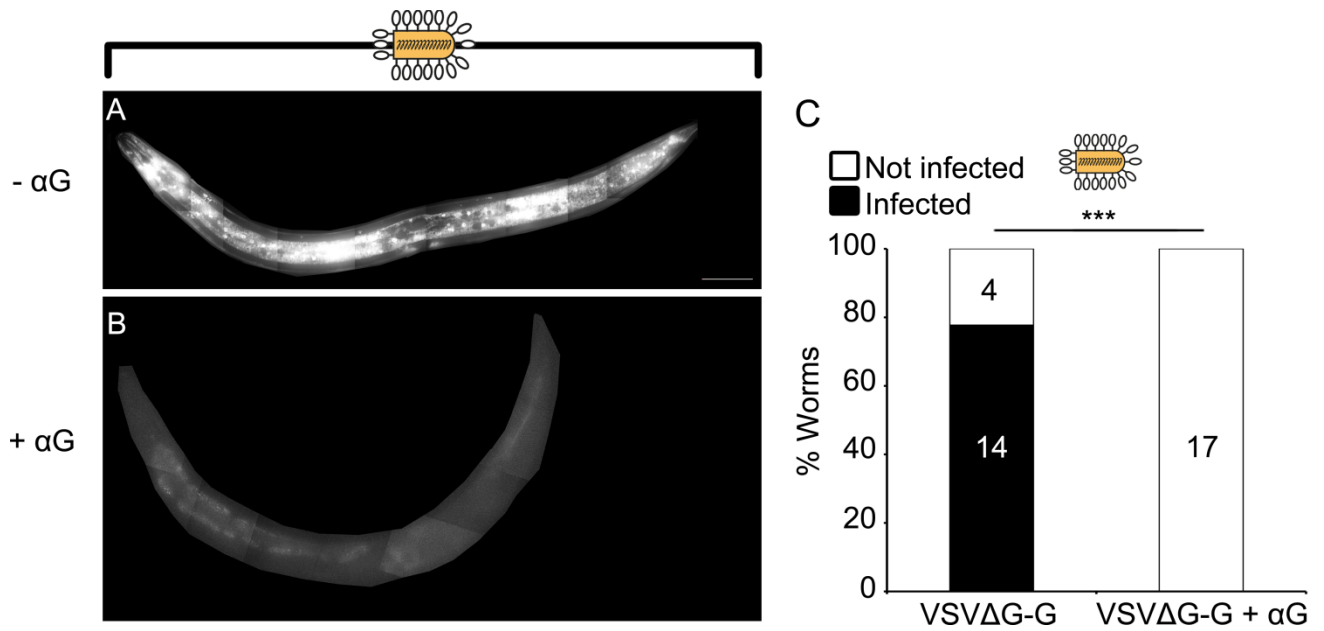

930

931

932 **Figure S4. Anti-VSV-G antibody blocks VSVΔG-G infection in living worms**

933 **(A-B)** SDC microscope Z-stack projections of *drh-1* worms injected with 4700 IU VSVΔG-G  
934 that was either not preincubated (-αG), or preincubated with αVSV-G antibody (+αG) and  
935 imaged 48 h later. Scale bar, 50 μm.

936 **(C)** Fraction of worms that are infected or not infected with VSVΔG-G or VSVΔG-G + αG.  
937 Animals were treated as in (A-B). n=18 and 17 animals for VSVΔG-G and VSVΔG-G+αG  
938 respectively. Fisher exact test. p\*\*\*<0.001.  
939

940 **Supplementary tables**

941 **Table S1. Phenotypes of worms with EFF-1 expressed in BWMs**

942

| Genotype                | <i>drh-1(-); hyEx375[myo-3p::mCherry, myo-3p::EFF-1]</i> |                           |            |
|-------------------------|----------------------------------------------------------|---------------------------|------------|
| Phenotype/ group        | <i>myo-3p::mCherry(+)</i>                                | <i>myo-3p::mCherry(-)</i> | P-value    |
| wt-like animals         | 110 ± 12 (81±3%)                                         | 60 ± 10 (87±6%)           | 0.39258    |
| Adult Unc+Dpy           | 3 ± 1 (2±1%)                                             | 0 (0%)                    | 0.05316    |
| Larval-arrested Unc+Dpy | 15 ± 2 (11±1%)                                           | 0 (0%)                    | 0.00029*** |
| Unhatched eggs          | 7 ± 2 (5±1%)                                             | 8 ± 3 (13±6%)             | 0.23501    |

943

944 Phenotype count of total progeny from 4 hermaphrodites with extrachromosomal array  
945 containing *myo-3p::EFF-1* and *myo-3p::mCherry*. Data presented as average of the progenies  
946 from 4 mothers ±SEM and the percentage out of total relevant group (e.g. *myo-3p::mCherry(+)*  
947 or *myo-3p::mCherry(-)*). P-value calculated for certain phenotype fraction (%) in *myo-*  
948 *3p::mCherry(+)* vs *myo-3p::mCherry(-)* groups. Two tailed Student's t-test. p<0.01\*\*\*.

949

950 **Table S2. AFF-1/EFF-1 expression in sensory neurons does not induce their infection**  
 951 **with VSV $\Delta$ G-AFF-1**  
 952

| Strain | Genotype                                                                                                          | Description                                                                                            | total # of worms | # VSV $\Delta$ G-AFF-1-infected worms | # worms with GFP(+) cells overlapping with EFF-1/AFF-1 expressing cells |
|--------|-------------------------------------------------------------------------------------------------------------------|--------------------------------------------------------------------------------------------------------|------------------|---------------------------------------|-------------------------------------------------------------------------|
| BP2126 | <i>drh-1(tm1329); eff-1(hy21); hyEx373 [pmyo-2::GFP, pdes-2::AFF-1(pME4), KS]</i>                                 | AFF-1 expressed in PVD (Oren-Suissa et al 2017) , in <i>eff-1(ts)</i> background                       | 18               | 6                                     | 0                                                                       |
| BP2131 | <i>drh-1(tm1329); eff-1(hy21); hyEx374 [pmec-4::EFF-1, pmec-4::dsRed, podr-1::EFF-1, podr-1::dsRed, KS] line1</i> | EFF-1 expressed in 12 sensory neurons (kind gift from M. Hilliard lab), in <i>eff-1(ts)</i> background | 28               | 15                                    | 0                                                                       |
| BP2132 | <i>drh-1(tm1329); eff-1(hy21); hyEx374 [pmec-4::EFF-1, pmec-4::dsRed, podr-1::EFF-1, podr-1::dsRed, KS] line2</i> | EFF-1 expressed in 12 sensory neurons, in <i>eff-1(ts)</i> background                                  | 22               | 7                                     | 0                                                                       |
| BP2133 | <i>drh-1(tm1329); eff-1(hy21); hyEx374 [pmec-4::EFF-1, pmec-4::dsRed, podr-1::EFF-1, podr-1::dsRed, KS] line3</i> | EFF-1 expressed in 12 sensory neurons, in <i>eff-1(ts)</i> background                                  | 35               | 13                                    | 0                                                                       |

953  
 954

955 **Table S3. Reagents, strains, oligos, plasmids and software**

| REAGENT or RESOURCE                                                                                                                                                                     | SOURCE                                    | IDENTIFIER           |
|-----------------------------------------------------------------------------------------------------------------------------------------------------------------------------------------|-------------------------------------------|----------------------|
| <b>Antibodies</b>                                                                                                                                                                       |                                           |                      |
| Anti-VSV-G [8G5F11] Antibody                                                                                                                                                            | Kerafast                                  | Cat#8G5F-11          |
| <b>Bacterial and Virus Strains and tissue culture cells</b>                                                                                                                             |                                           |                      |
| Recombinant Vesicular Stomatitis Virus VSVΔG                                                                                                                                            | [68]<br>Caenorhabditis<br>Genetics Center | VSVΔG                |
| <i>E. coli</i> : OP50-1                                                                                                                                                                 |                                           | OP50-1               |
| BHK-21(ATCC)                                                                                                                                                                            | [69]                                      | BHK-21(ATCC)         |
| <b>Chemicals, Peptides, and Recombinant Proteins</b>                                                                                                                                    |                                           |                      |
| FUdR                                                                                                                                                                                    | Sigma                                     | Cat#F0503-1G         |
| Tetramisole                                                                                                                                                                             | Sigma                                     | Cat#L9756-5G         |
| Dulbecco's Modified Eagles Medium (DMEM) High glucose, Gibco™                                                                                                                           | Thermo Scientific                         | Cat#41965039         |
| Fugene HD                                                                                                                                                                               | Promega                                   | Cat#E2311            |
| OptiMEM                                                                                                                                                                                 | Gibco                                     | Cat#31985070         |
| Dulbecco's Phosphate Buffered Saline (DPBS) With Calcium and Magnesium                                                                                                                  | Biological Industries                     | Cat#02-020-1A        |
| Certified Fetal Bovine Serum (FBS), Heat Inactivated                                                                                                                                    | Biological Industries                     | Cat#04-121-1A        |
| <b>C. elegans strains</b>                                                                                                                                                               |                                           |                      |
| <i>drh-1(tm1329) IV</i>                                                                                                                                                                 | [7]                                       | <i>drh-1(tm1329)</i> |
| <i>eff-1(ok1021)II</i>                                                                                                                                                                  | [14]                                      | BP347                |
| <i>drh-1(tm1329) IV; eff-1(ok1021)II</i>                                                                                                                                                | This paper                                | BP2122               |
| Strain <i>eff-1(hy21)II</i>                                                                                                                                                             | [14, 19]                                  | BP75                 |
| <i>drh-1(tm1329) IV; eff-1(hy21)II</i>                                                                                                                                                  | This paper                                | BP2123               |
| <i>drh-1(tm1329) IV; aff-1(tm2214)II</i>                                                                                                                                                | This paper                                | BP2124               |
| <i>dziS53[F49H124p::mCherry] Unknown chromosome</i>                                                                                                                                     | [70]                                      | EB2110               |
| <i>drh-1(tm1329) IV; dziS53[F49H124p::mCherry]</i>                                                                                                                                      | This paper                                | BP2121               |
| <i>trls10 [myo-3p::MB::YFP + myo-2p::YFP + ceh-23::HcRed + unc-25::DsRed + unc-129nsp::CFP]</i>                                                                                         | Caenorhabditis<br>Genetics Center         | RP1                  |
| <i>eff-2 (hy51) II; mcls46[dlg-1::RFP;unc-119(+)]III</i>                                                                                                                                | This paper                                | BP2104               |
| <i>drh-1(tm1329) IV ; eff-2(hy51) II</i>                                                                                                                                                | This paper                                | BP2125               |
| <i>drh-1(tm1329)IV; hyEx375 [myo-3p::EFF-1, myo-3p::mCherry, KS bluescript]</i>                                                                                                         | This paper                                | BP2137               |
| <i>trls10 [myo-3p::MB::YFP + myo-2p::YFP + ceh-23::HcRed + unc-25::DsRed + unc-129nsp::CFP];hyEx375 [myo-3p::EFF-1, myo-3p::mCherry, KS bluescript]</i>                                 | This paper                                | BP2171-3             |
| <i>drh-1(tm1329) IV; eff-1(hy21) II; hyEx373 [myo-2p::GFP, des-2p::AFF-1, KS bluescript]</i>                                                                                            | This paper                                | BP2126               |
| <i>drh-1(tm1329) IV; eff-1(hy21) II; hyEx374 [mec-4p::EFF-1, pmec-4::dsRed, podr-1::EFF-1, odr-1p::dsRed, KS bluescript]</i>                                                            | This paper                                | BP2131-3             |
| <b>Oligonucleotides</b>                                                                                                                                                                 |                                           |                      |
| Primer: Cloning <i>myo-3p</i> from <i>myo3p::mCherry</i> Plasmid with <i>Sall</i> restriction enzyme:<br>ACGCGTCGAC AGTGATTATAGTCTGTTTTTC                                               | This paper                                | LXH60                |
| Primer: Cloning <i>myo-3p</i> from <i>myo3p::mCherry</i> Plasmid with <i>NheI</i> restriction enzyme:<br>CTAGCTAGCCATTCTAGATGGATCTAGTG                                                  | This paper                                | LXH61                |
| Oligonucleotide: Conversion oligonucleotide encoding wt <i>pha-1</i> repair fragment for CRISPR:<br><i>caaaatacgaatcgaagactcaaaaagagtatgctgtatgattacagatgttcaagttattcataaatcatgatag</i> | This paper                                | BG123                |
| Primer: Addition of homology arms to <i>eff-2</i> around <i>mNeonGreen</i> for CRISPR:<br><i>ttcctgaagttcatcaaatcgaagctggcGcgtatttcagaagcATGGTTCCAAGGAGAAAGAGG</i>                      | This paper                                | BG129                |
| Primer: Addition of homology arms to <i>eff-2</i> around <i>mNeonGreen</i> for CRISPR:<br><i>agattctaagtgtcagatagcttgatgatCtgCgagagaataactaGACTAGTAGGAAACAGTTATGTTTGG</i>               | This paper                                | BG130                |
| Primer: Production of sgRNA plasmid targeting <i>eff-2</i> at locus AGAAGCAGAATAAACTGGGGAGG for CRISPR: AGAAGCAGAATAAACTGGGGGTTTTAGAGCTAGAAATAGC                                        | This paper                                | BG84                 |
| Primer: Production of sgRNA plasmid targeting <i>eff-2</i> at locus AGAAGCAGAATAAACTGGGGAGG for CRISPR: CCCAGTTTATTCTGCTTCTAAACATTTAGATTGCAATTC                                         | This paper                                | BG85                 |

### Recombinant DNA

|                                                                                                |                        |                        |
|------------------------------------------------------------------------------------------------|------------------------|------------------------|
| Plasmid pCAGGS-Gind: <i>pCAGGS::VSV-G Indiana</i>                                              | [68]                   | pCAGGS-Gind            |
| Plasmid pOA20: <i>pCAGGS::aff-1::FLAG</i>                                                      | [6]                    | pOA20                  |
| Plasmid pKSI-1: pBluescript empty vector                                                       | [71]                   | Addgene plasmid #51725 |
| Plasmid pXH20: <i>myo-3p::EFF-1</i>                                                            | This paper             | pXH20                  |
| Plasmid pME1: <i>hsp16.2::EFF-1</i>                                                            | [19]                   | pME1                   |
| Plasmid pCFJ104: <i>myo-3p::mCherry</i>                                                        | [72]                   | Addgene plasmid #19328 |
| Plasmid pBG115: <i>CeU6p::eff-2_sgRNA for CRISPR</i>                                           | This paper             | pBG115                 |
| Plasmid pDD162: <i>eft-3p::Cas9 + Empty sgRNA for CRISPR</i>                                   | [73]                   | Addgene plasmid #47549 |
| Plasmid pJW1285: <i>eft-3p::Cas-9-SV40 NLSNLS::tbb-2 3'UTR + CeU6p::pha-1_sgRNA for CRISPR</i> | [74]                   | Addgene plasmid #61252 |
| Plasmid pNG1: <i>dlg-1p::Lifeact::mNeonGreen</i>                                               | Kind gift of A. Hajnal | pNG1                   |
| PCR amplicon: <i>mNeonGreen flanked by homology arms to the eff-2 gene for CRISPR</i>          | This paper             | N/A                    |
| Plasmid : <i>odr-1p::dsRed</i>                                                                 | [24]                   | odr-1p::dsRed          |
| Plasmid: <i>odr-1p::EFF-1</i>                                                                  | [24]                   | odr-1p::EFF-1          |
| Plasmid: <i>mec-4p::EFF-1</i>                                                                  | [24]                   | mec-4p::EFF-1          |
| Plasmid: <i>mec-4p::mCherry</i>                                                                | [24]                   | pmec-4::mCherry        |

### Software

|                             |                         |                                                                         |
|-----------------------------|-------------------------|-------------------------------------------------------------------------|
| Fiji                        | NIH image               |                                                                         |
| GraphPad Prism 8            | GraphPad Software, Inc. |                                                                         |
| Adobe Photoshop CS5 and CS6 | Adobe                   |                                                                         |
| MetaMorph 7.8.1.0           | Molecular Devices       | <a href="https://www.moleculardevices">https://www.moleculardevices</a> |
| Micro-Manager               | [75]                    | <a href="https://micro-manager.org">https://micro-manager.org</a>       |

957 **Data for movies**

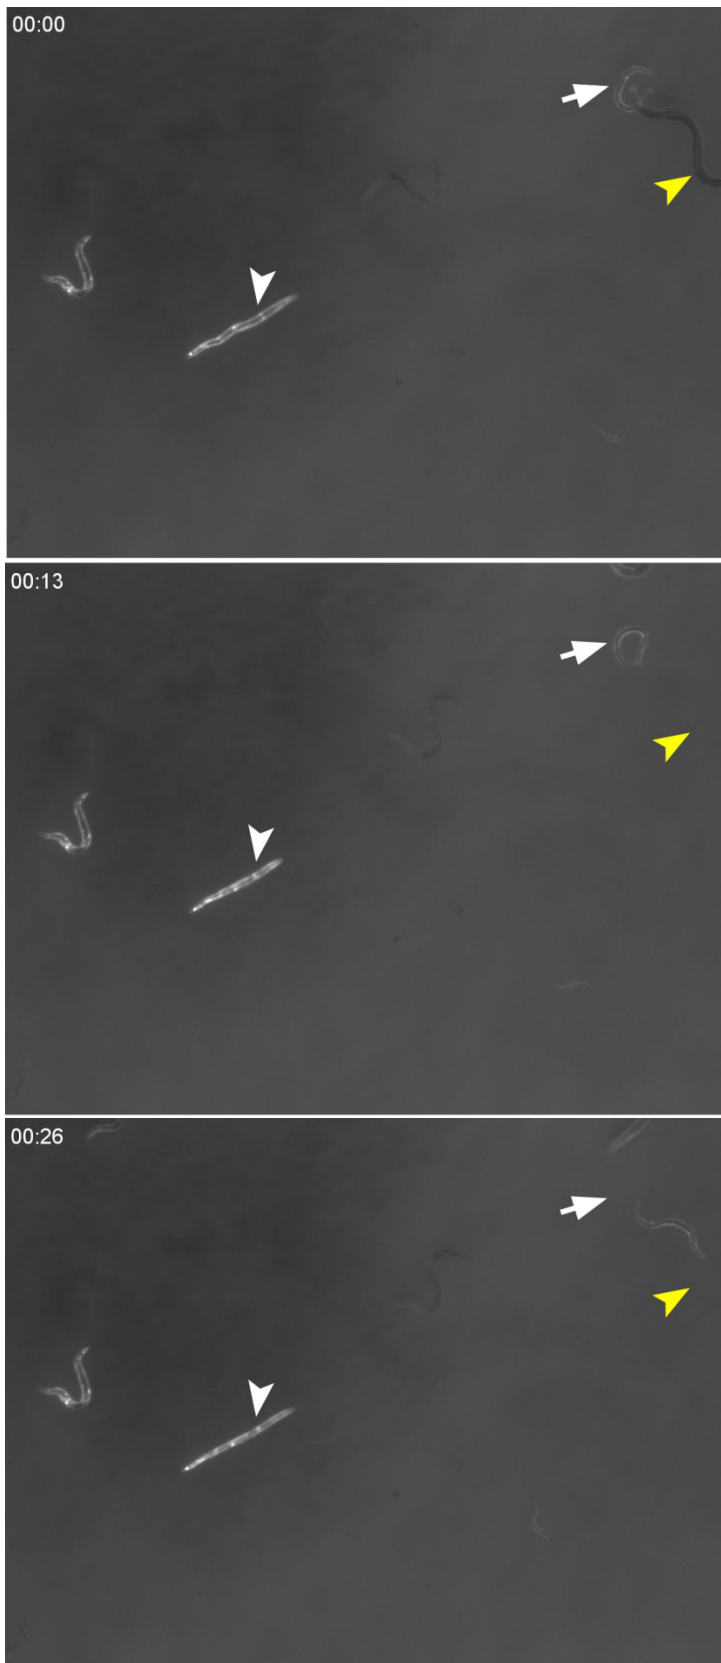

**Movie S1. EFF-1 ectopic expression in BWMs results in Uncoordinated and Dumpy (Unc+Dpy) phenotypes**

Mixed population of worms with extrachromosomal *pmyo-3::mCherry* and *pmyo-3::EFF-1*. White arrowhead point to mCherry(+) worm that is Unc+Dpy. White arrow point to mCherry(+) worm that is wt-like. Yellow arrowhead points to a wt-like mCherry(-) worm, which left the frame within seconds. Elapsed time (seconds) indicated in top left corner.

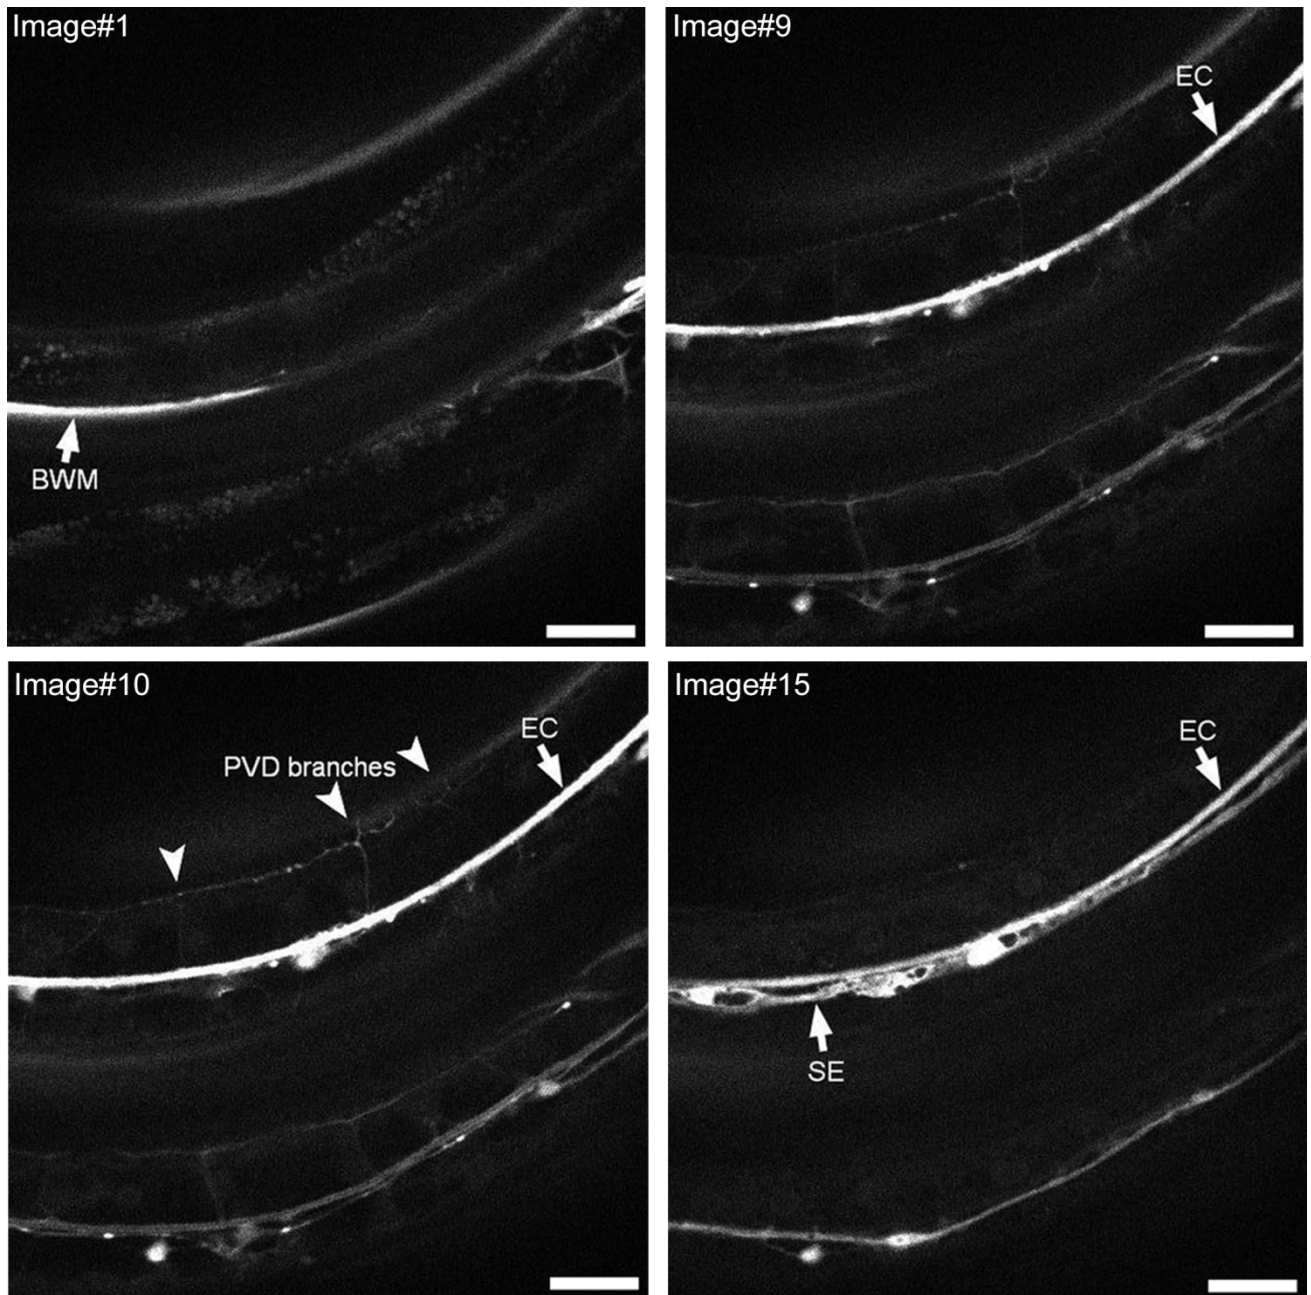

977

978

979 **Movie S2. VSV $\Delta$ G-G infects PVD neuron**

980 SDC microscope Z-stack of young adult worm injected with  $10^6$  IU VSV $\Delta$ G-G and imaged 48h  
981 later. Arrowheads, infected PVD's candelabra/menorahs arborized branches. Arrows, infected  
982 cell. BWM-Body Wall Muscle, EC-Excretory Cell, SE-Seam cell syncytium. Scale bars, 25  $\mu$ m.  
983 Note that there is a second worm (bottom, not indicated in images), also showing infected  
984 PVD branches, EC, SE and a muscle cell.
